# Supplementary material for: Synthesis and evaluation of new pirfenidone derivatives as anti-fibrosis agents
Source: Royal Society of Chemistry journal article supplement (doi:10.1039/d2ra00990k), 2022-01-01
Supplement: d2ra00990k1.pdf [file d2ra00990k1.pdf]

Supporting Information

**Synthesis and evaluation of new pirfenidone derivatives as anti-fibrosis agents**

Chenxi Gu<sup>a</sup>, Wei Li<sup>a</sup>, Qing Ju<sup>b</sup>, Han Yao<sup>a</sup>, Lisheng Yang<sup>a</sup>, Baijiao An<sup>b</sup>, Wenhao Hu<sup>a\*</sup> and Xingshu Li<sup>a\*</sup>

<sup>a</sup>School of Pharmaceutical Sciences, Sun Yat-Sen University, Guangzhou 510006, PR China.

<sup>b</sup>Medicine and Pharmacy Research Center, Binzhou Medical University, Yantai, Shandong Province, 264003, PR China

<sup>1</sup>H NMR, <sup>13</sup>C NMR, Mass and HPLC spectral data of compounds.

<sup>1</sup>H NMR and <sup>13</sup>C NMR of **2a**

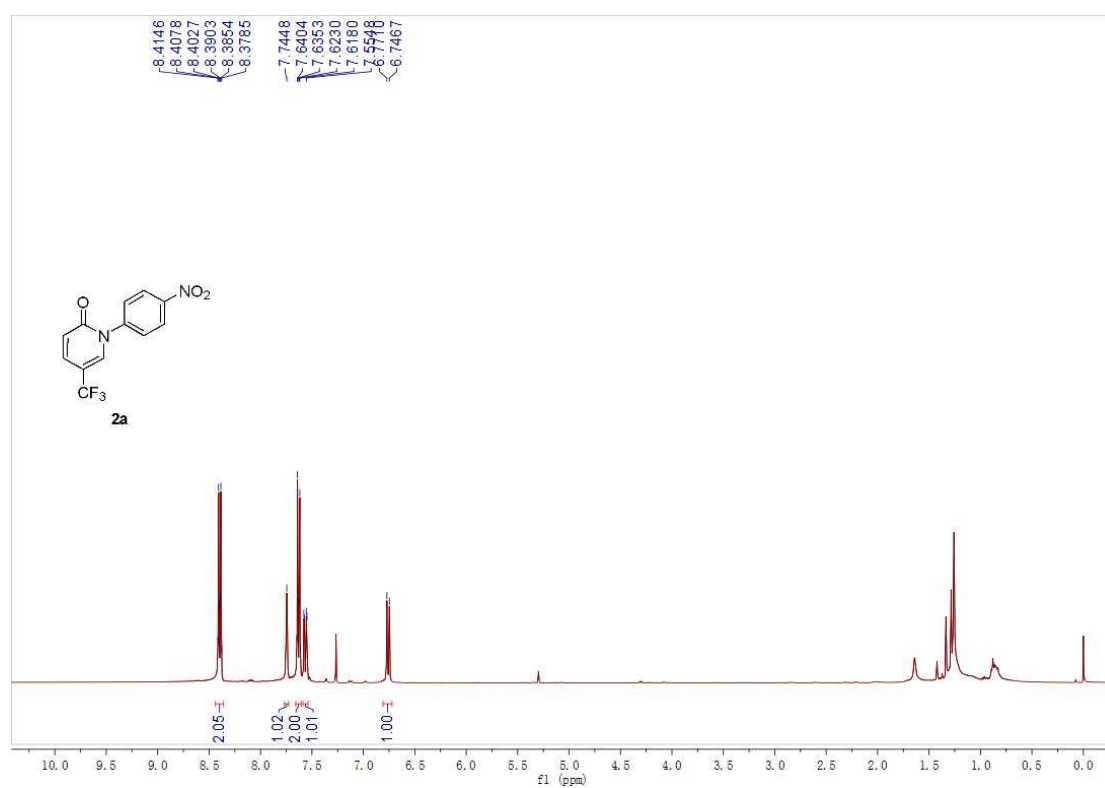

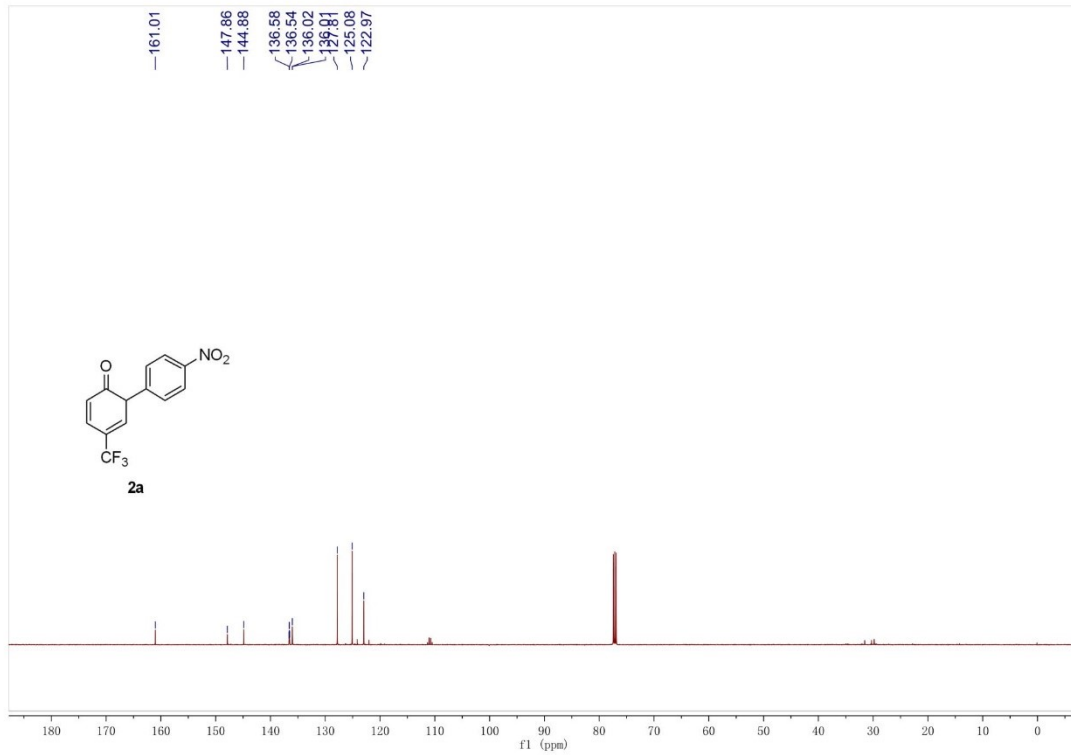

**<sup>1</sup>H NMR and <sup>13</sup>C NMR of 2b**

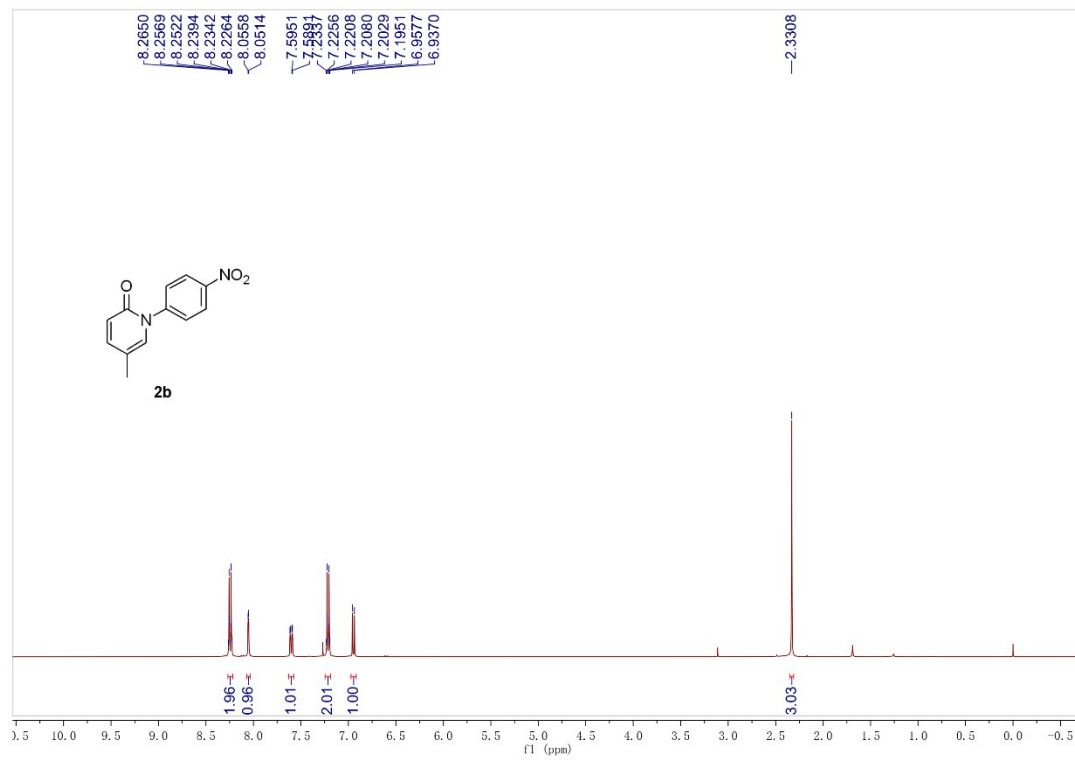

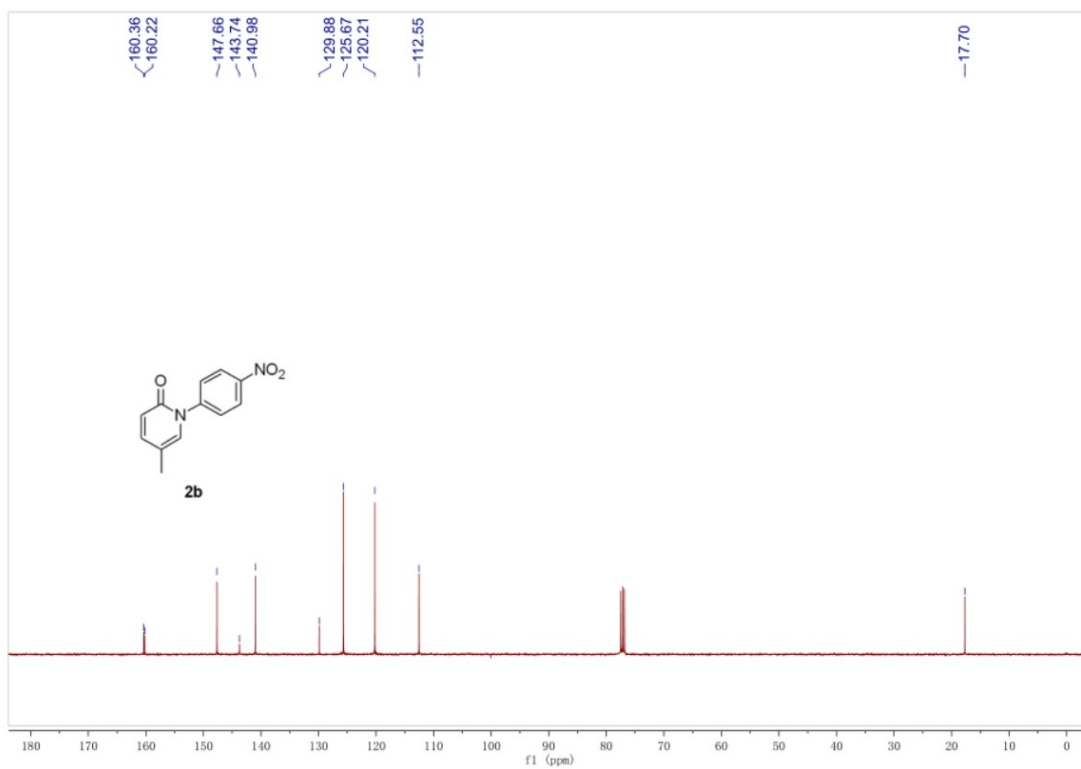

**<sup>1</sup>H NMR and <sup>13</sup>C NMR of 3a**

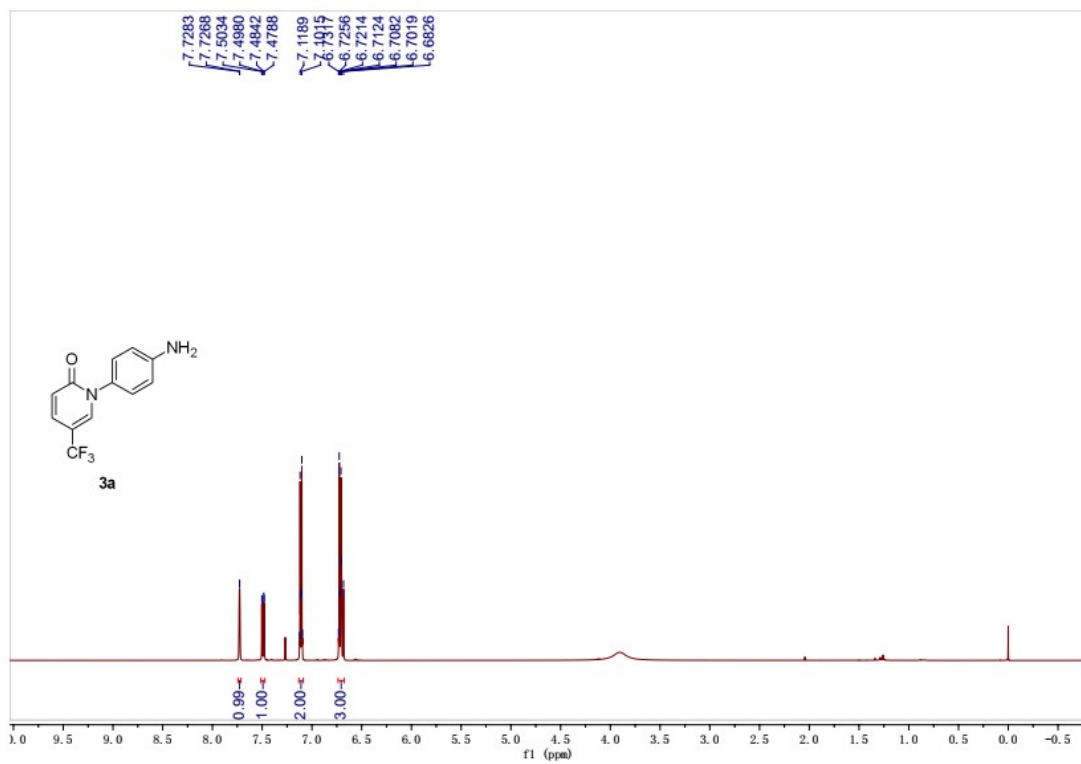

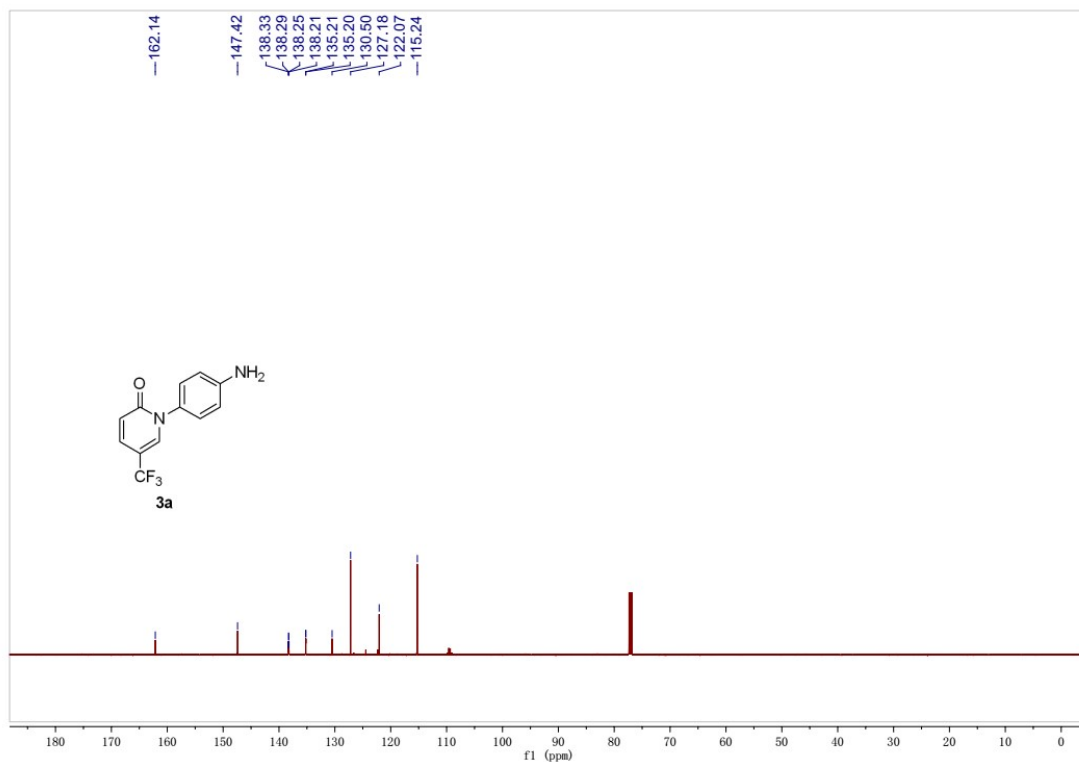

**<sup>1</sup>H NMR and <sup>13</sup>C NMR of 3b**

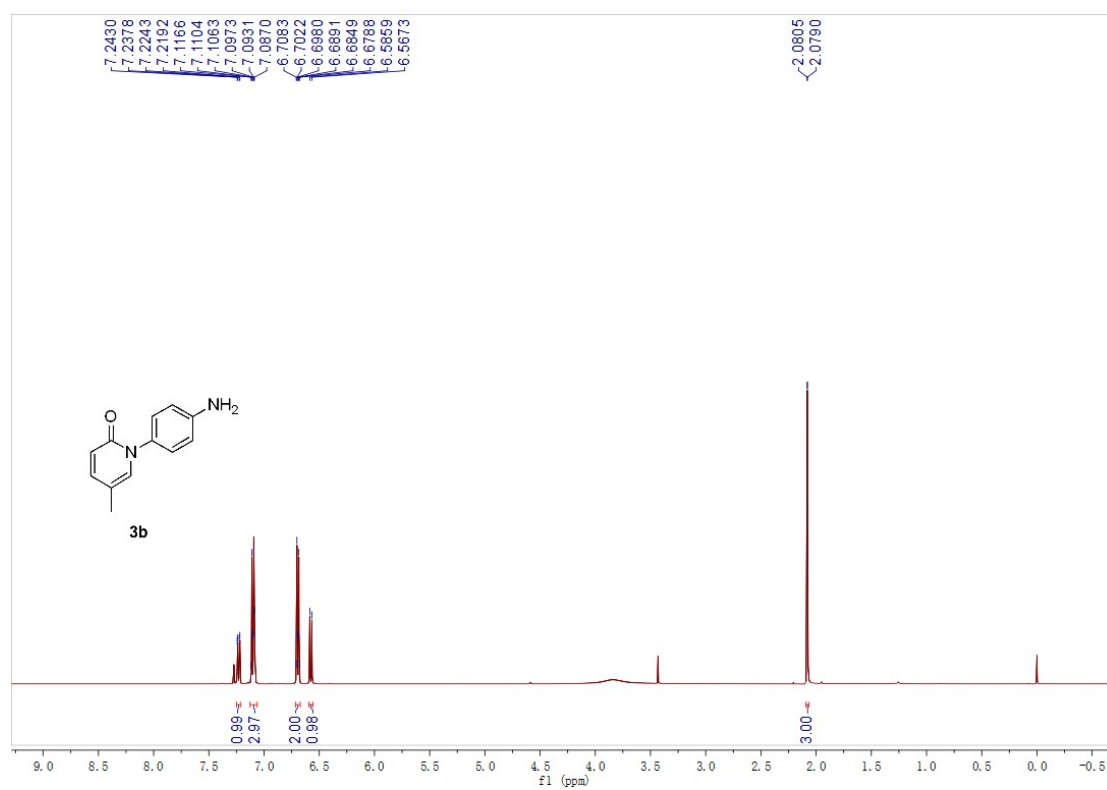

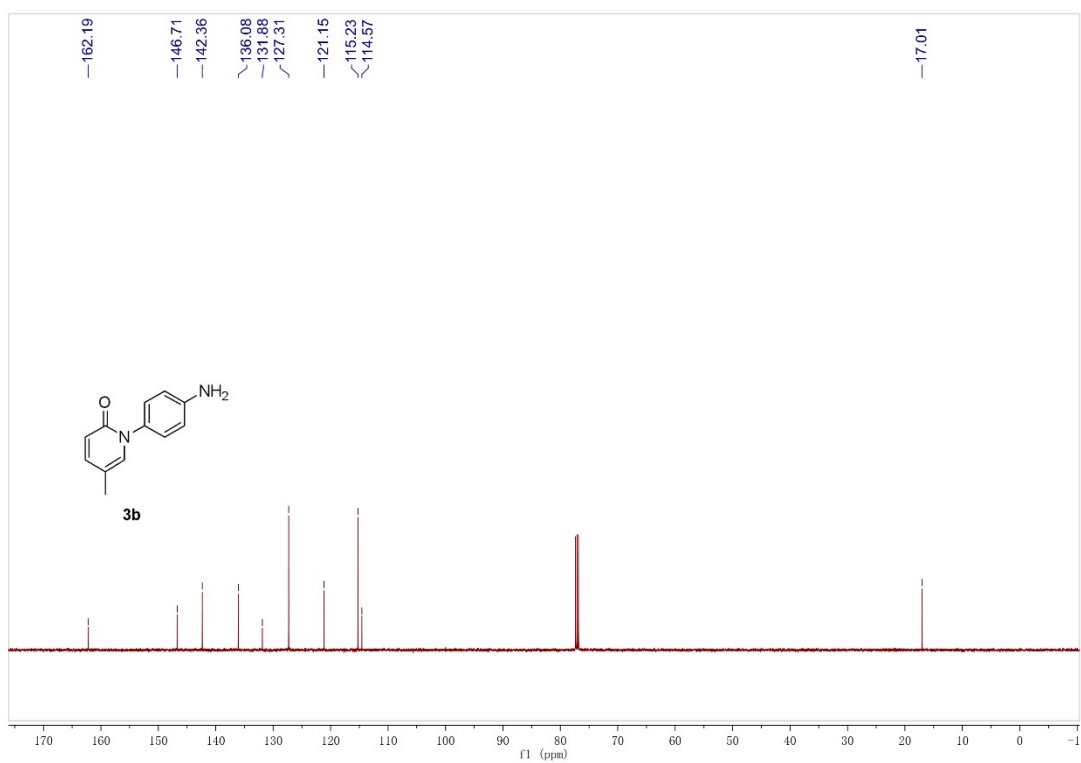

$^1\text{H}$  NMR and  $^{13}\text{C}$  NMR of **4a**

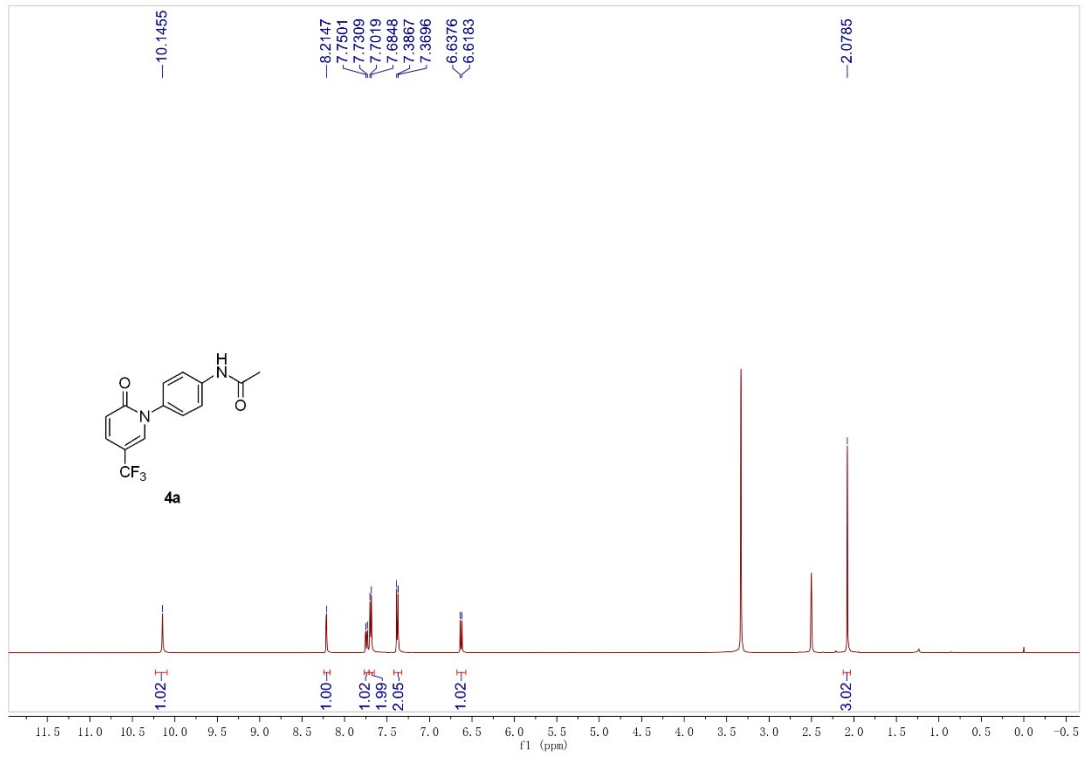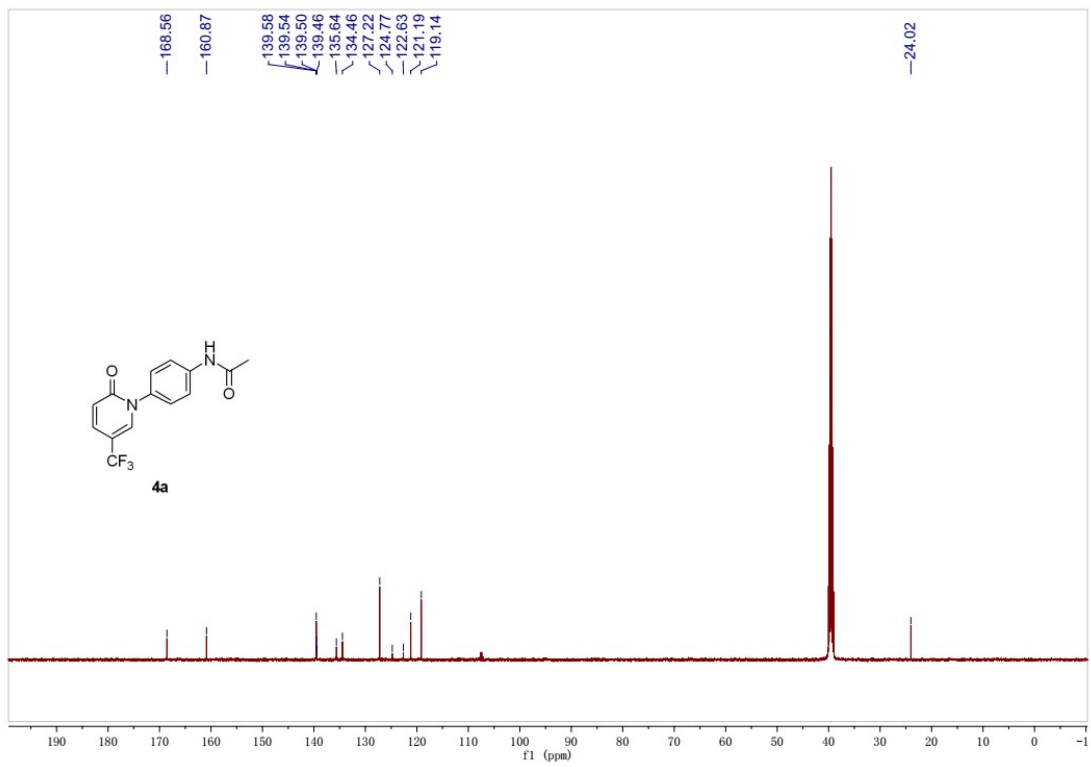

Mass of **4a**

Measured region for 319.0666 m/z

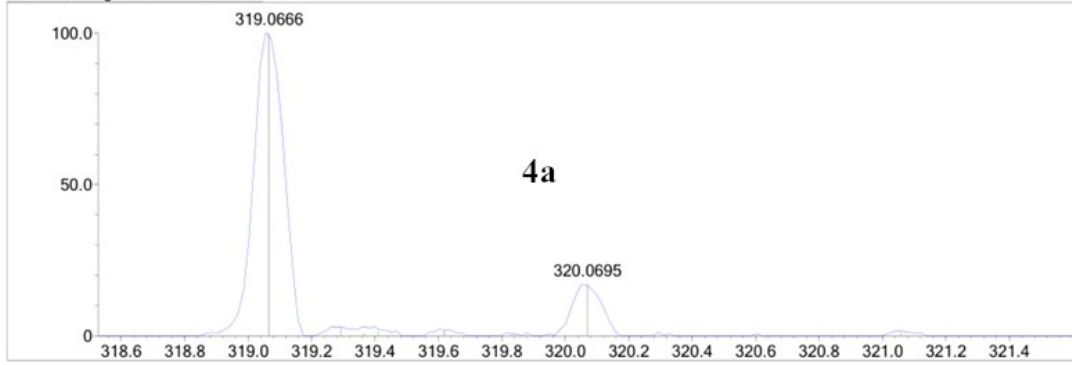

### HPLC of 4a

mAU

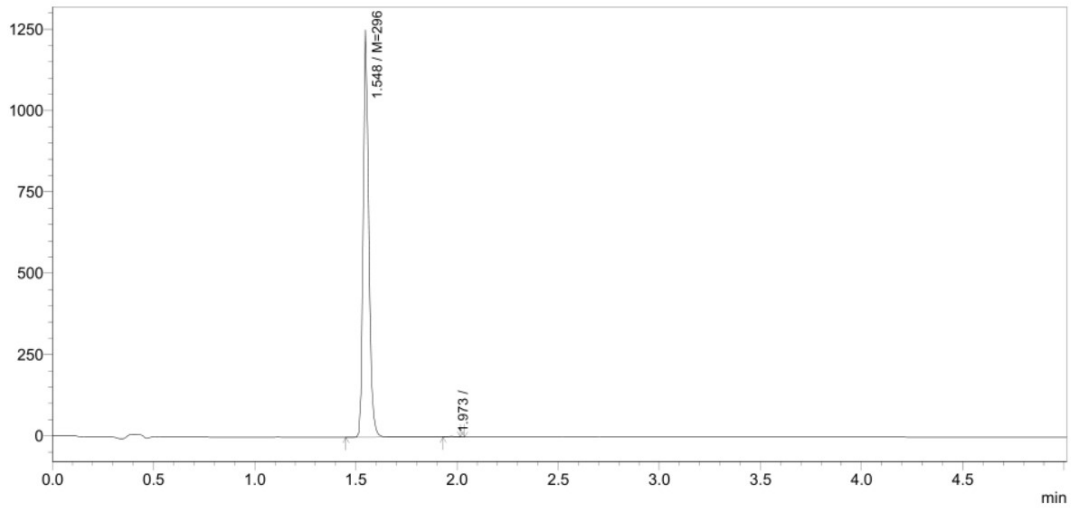

峰表

| 保留时间  | 化合物名  | 峰宽(高度 50%) | 高度      | 面积      | 面积%    | 理论塔板数(USP) | 拖尾因子  | 分离度(USP) |
|-------|-------|------------|---------|---------|--------|------------|-------|----------|
| 1.548 | M=296 | 0.029      | 1252978 | 2388386 | 99.788 | 10908      | 1.208 | -        |
| 1.973 |       | 0.027      | 3007    | 5078    | 0.212  | 22598      | 1.158 | 7.597    |

# $^1\text{H}$ NMR and $^{13}\text{C}$ NMR of **4b**

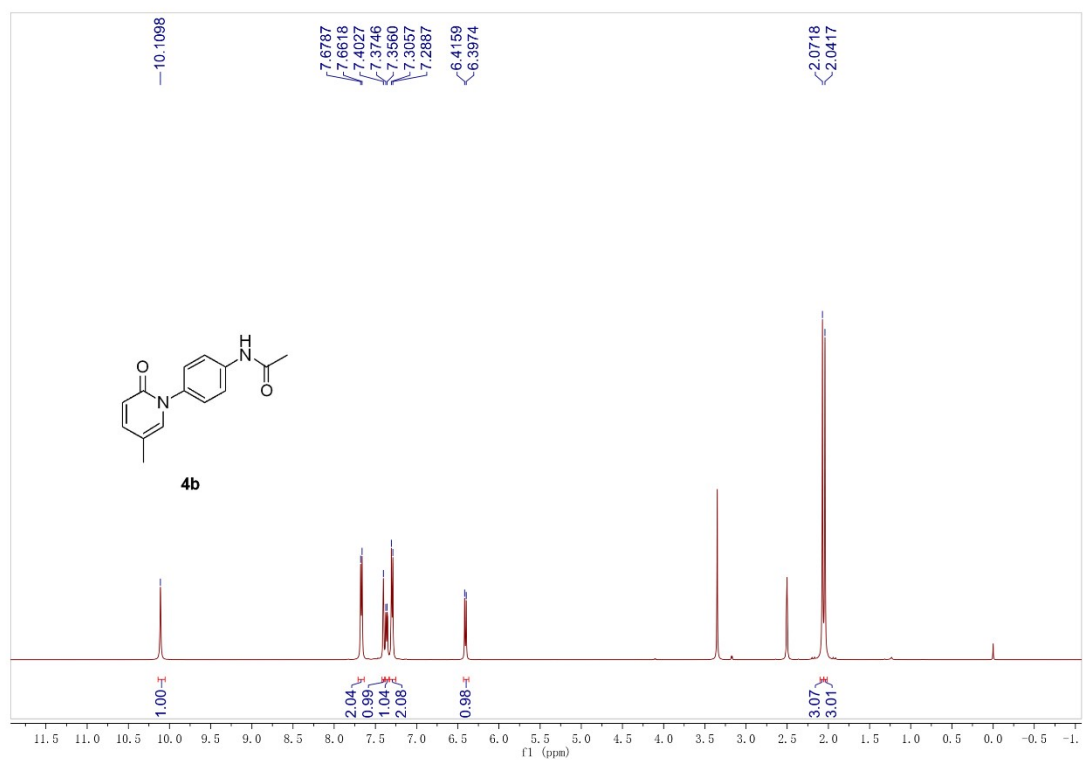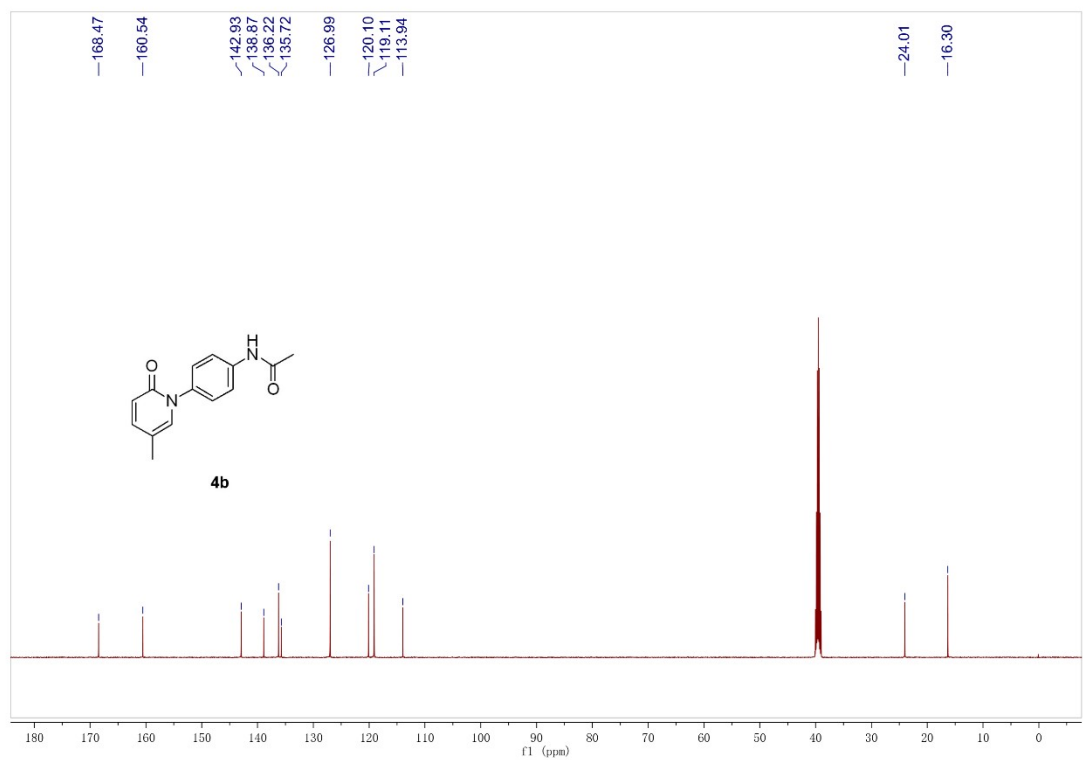

Mass of **4b**



Measured region for 243.1140 m/z

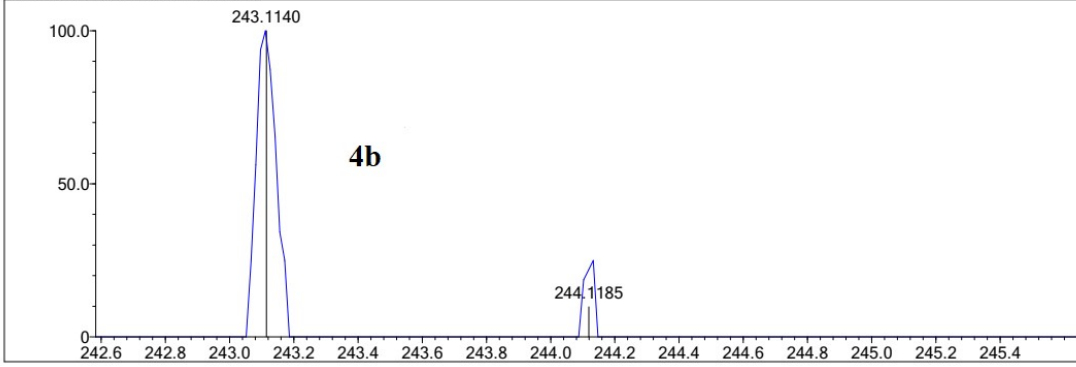

### HPLC of 4b

mAU

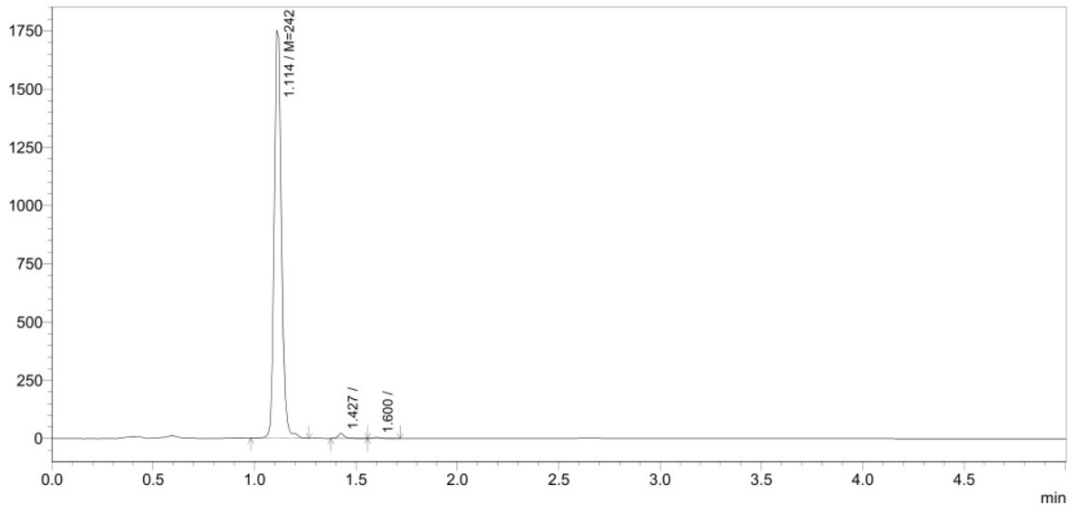

峰表

| 保留时间  | 化合物名  | 峰宽(高度 50%) | 高度      | 面积      | 面积%     | 理论塔板数(USP) | 拖尾因子  | 分离度(USP) |
|-------|-------|------------|---------|---------|---------|------------|-------|----------|
| 1.114 | M=242 | 0.037      | 1753851 | 4319620 | 98.676  | 3789       | 1.153 | —        |
| 1.427 |       | 0.030      | 22461   | 46482   | 1.062   | 8886       | 1.088 | 4.711    |
| 1.600 |       | 0.030      | 5587    | 11472   | 0.262   | 11584      | 1.508 | 2.871    |
|       |       |            | 1781900 | 4377573 | 100.000 |            |       |          |

# $^1\text{H}$ NMR and $^{13}\text{C}$ NMR of **5a**

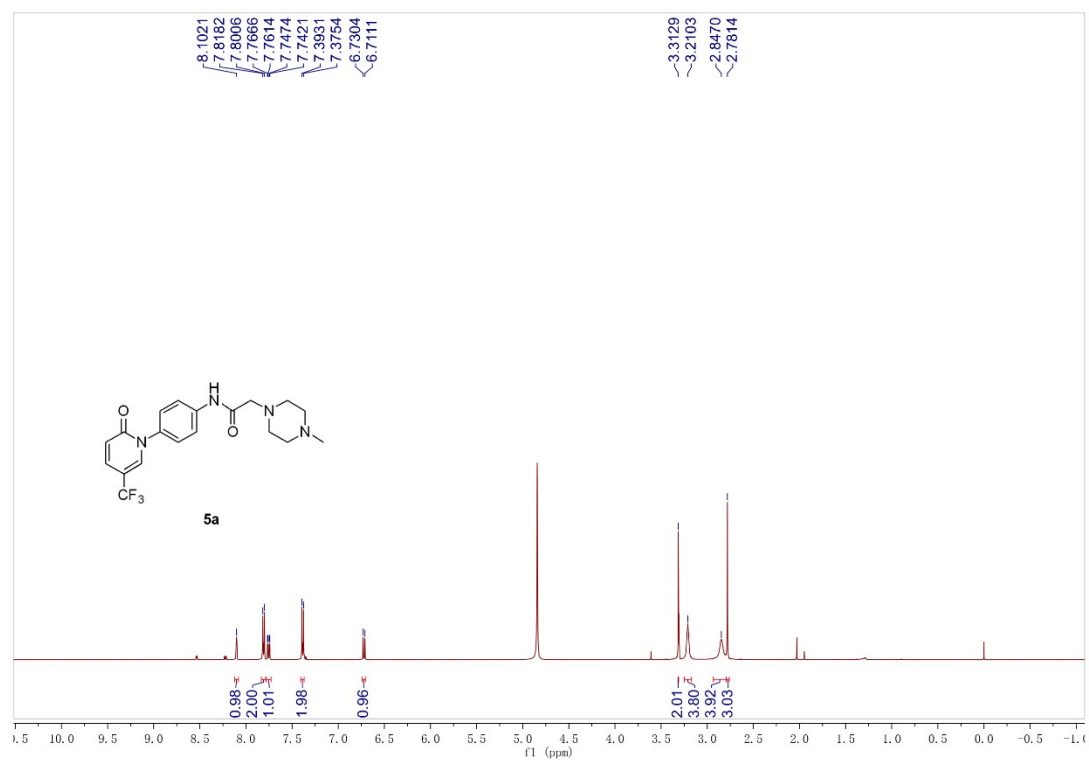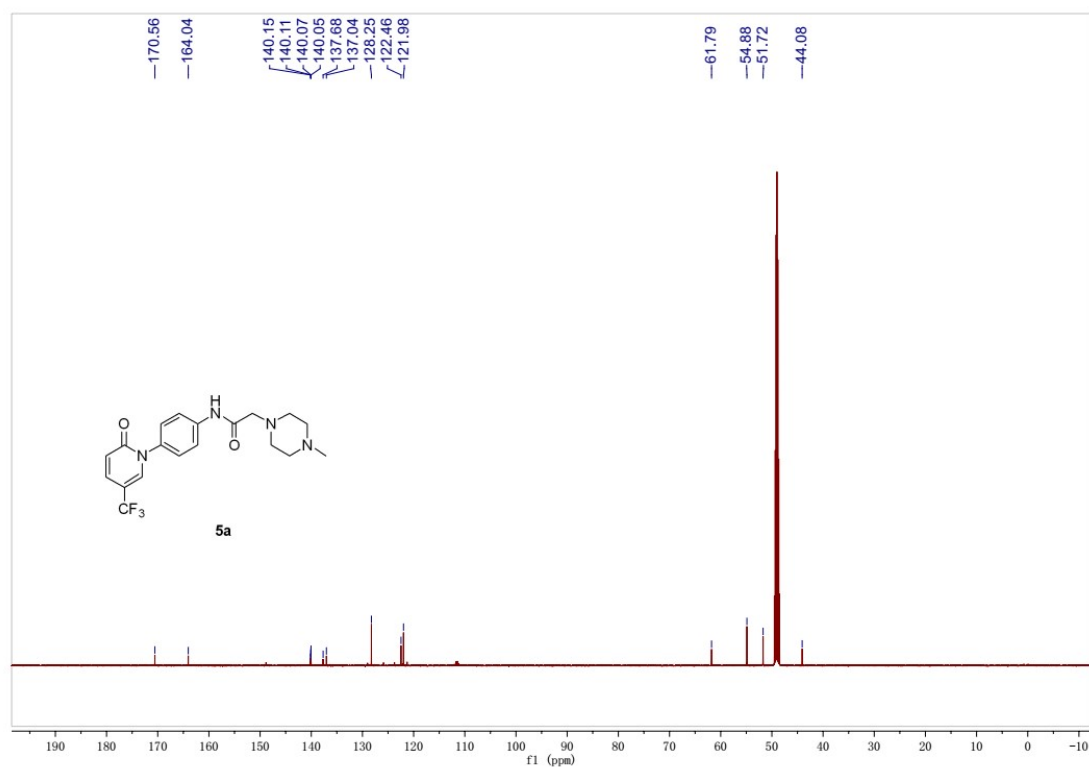

Mass of **5a**

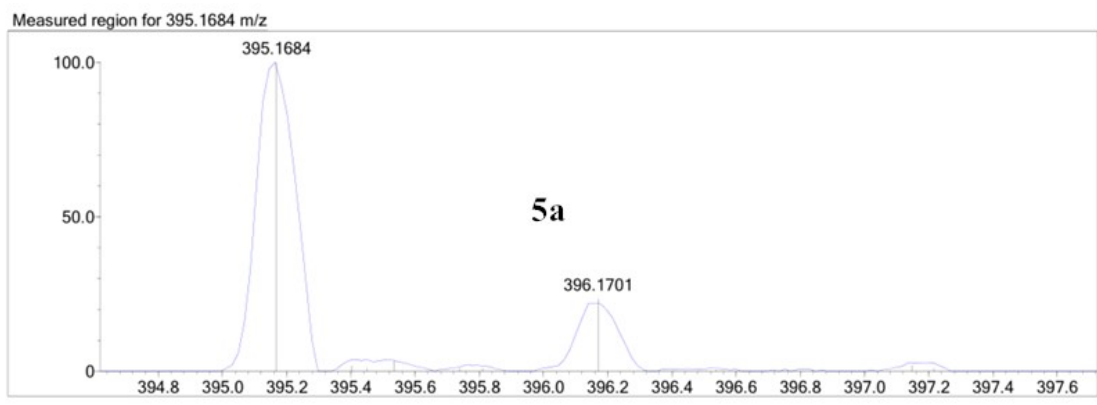

**HPLC of 5a**

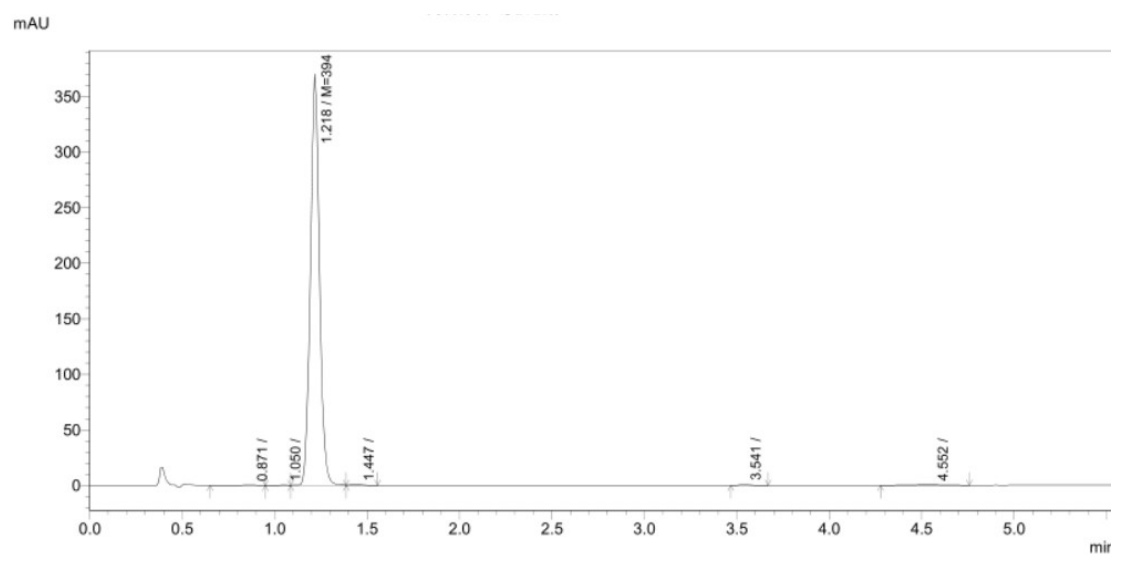

峰表

| 保留时间  | 化合物名  | 峰宽(高度 50%) | 高度     | 面积      | 面积%     | 理论塔板数(USP) | 拖尾因子  | 分离度(USP) |
|-------|-------|------------|--------|---------|---------|------------|-------|----------|
| 0.871 |       | 0.113      | 330    | 2574    | 0.200   | 289        | 0.657 | —        |
| 1.050 |       | —          | 365    | 1526    | 0.119   | 834        | —     | 1.024    |
| 1.218 | M=394 | 0.052      | 370957 | 1271273 | 98.740  | 2162       | 1.059 | 1.345    |
| 1.447 |       | —          | 628    | 3638    | 0.283   | 479        | —     | 1.239    |
| 3.541 |       | 0.048      | 991    | 3237    | 0.251   | 21832      | 1.507 | 11.615   |
| 4.552 |       | 0.255      | 338    | 5246    | 0.407   | 2259       | 0.858 | 4.222    |
|       |       |            | 373608 | 1287493 | 100.000 |            |       |          |

$^1\text{H}$  NMR and  $^{13}\text{C}$  NMR of **5b**

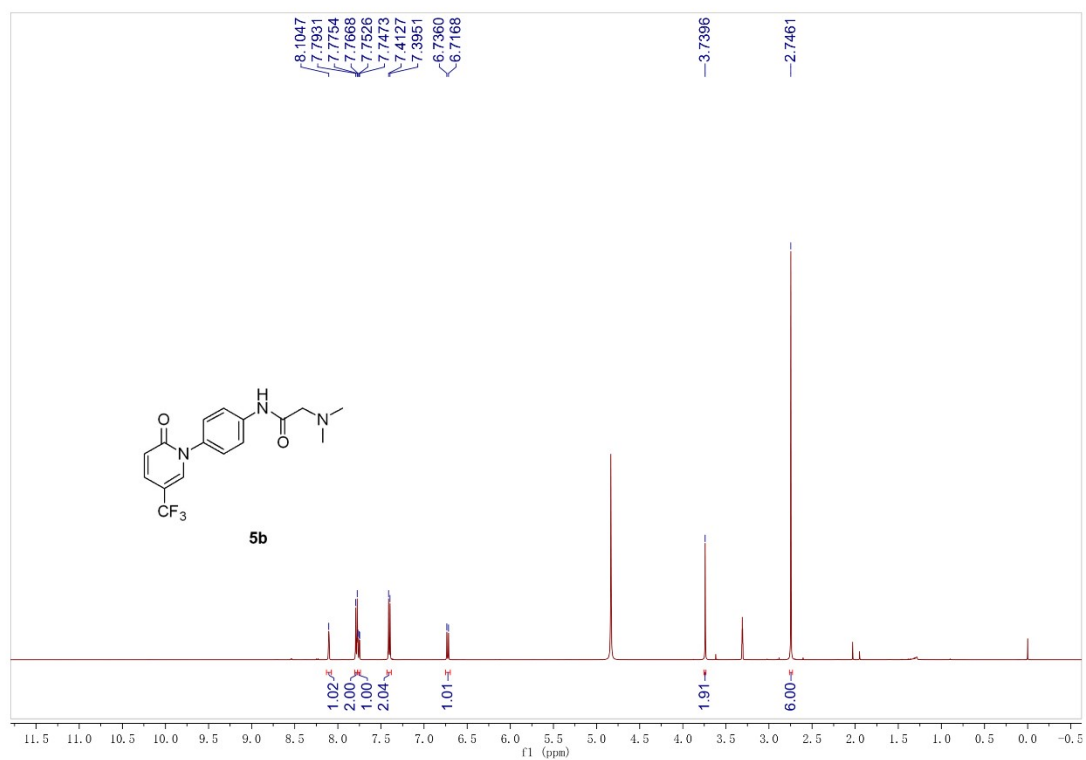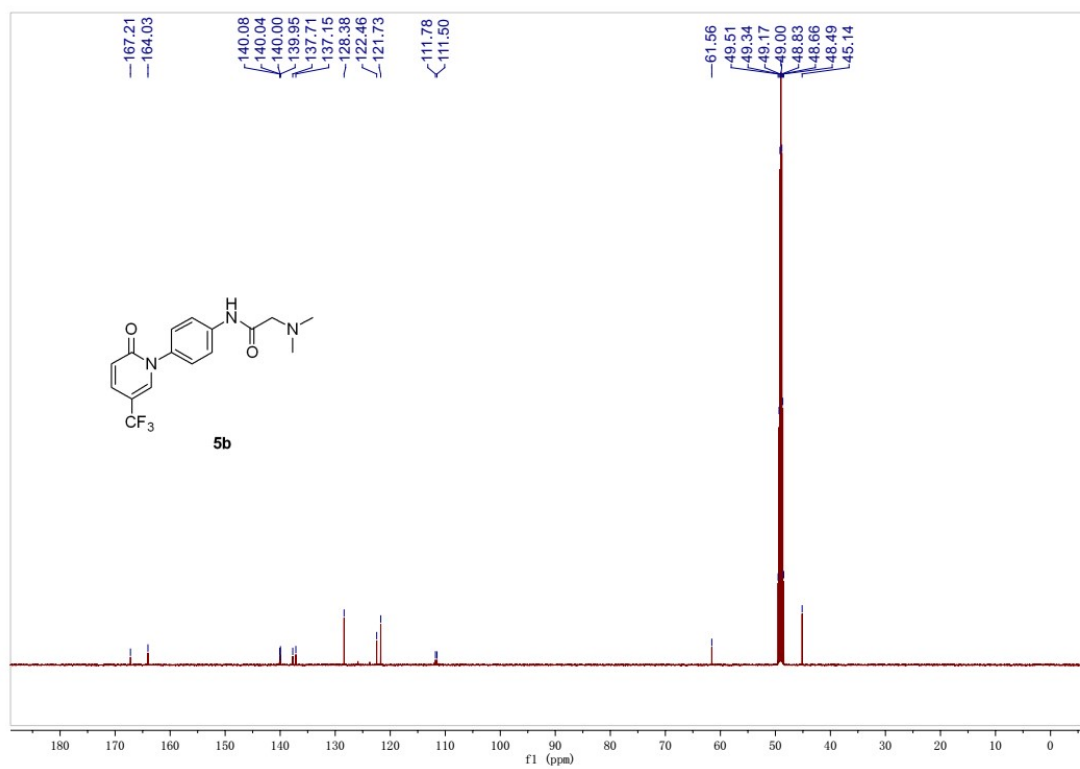

Mass of **5b**

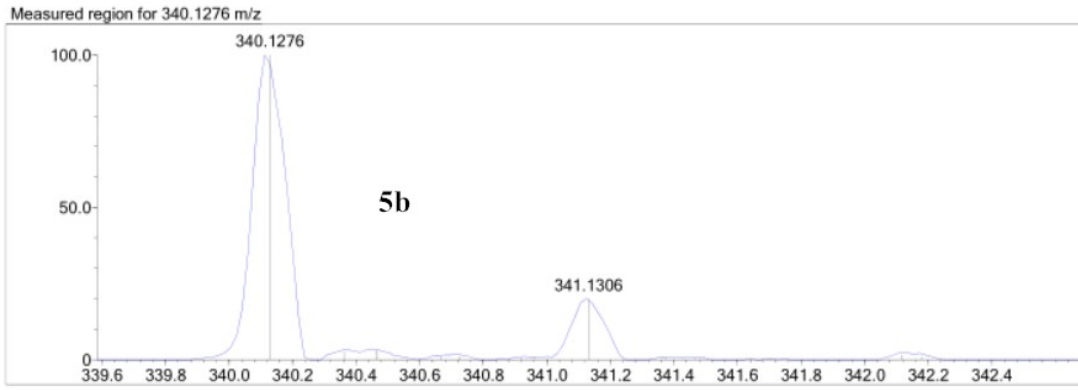

### HPLC of 5b

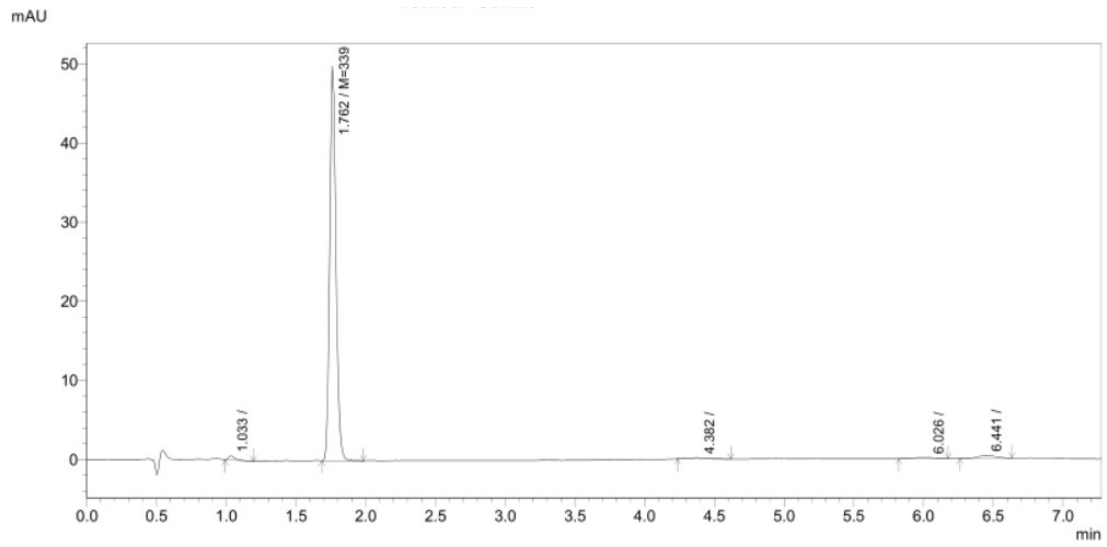

峰表

| 保留时间  | 化合物名  | 峰宽(高度 50%) | 高度    | 面积     | 面积%     | 理论塔板数(USP) | 拖尾因子  | 分离度(USP) |
|-------|-------|------------|-------|--------|---------|------------|-------|----------|
| 1.033 |       | 0.049      | 516   | 1609   | 1.000   | 1838       | 1.563 |          |
| 1.762 | M=339 | 0.047      | 49882 | 154007 | 95.716  | 5453       | 1.174 | 7.600    |
| 4.382 |       | 0.147      | 142   | 1354   | 0.842   | 4439       | 1.221 | 14.614   |
| 6.026 |       | 0.146      | 117   | 1155   | 0.718   | 9162       | 0.848 | 6.384    |
| 6.441 |       | 0.135      | 331   | 2774   | 1.724   | 11368      | 1.261 | 1.682    |
|       |       |            | 50989 | 160899 | 100.000 |            |       |          |

# $^1\text{H}$ NMR and $^{13}\text{C}$ NMR of **5c**

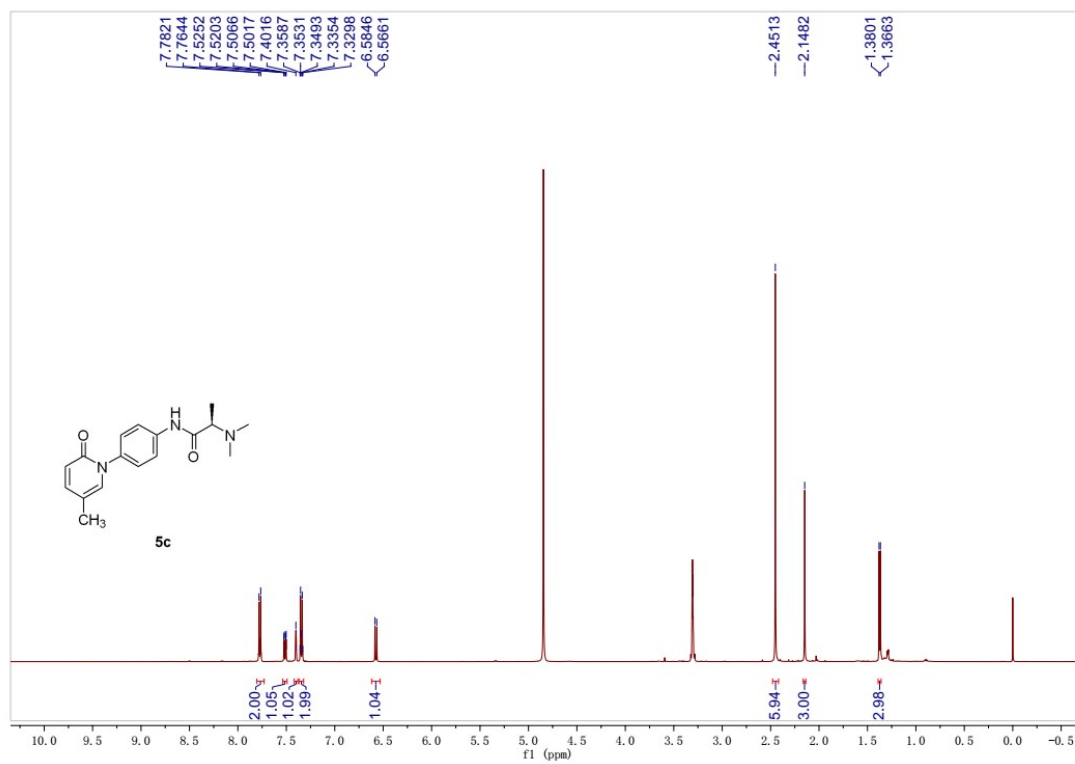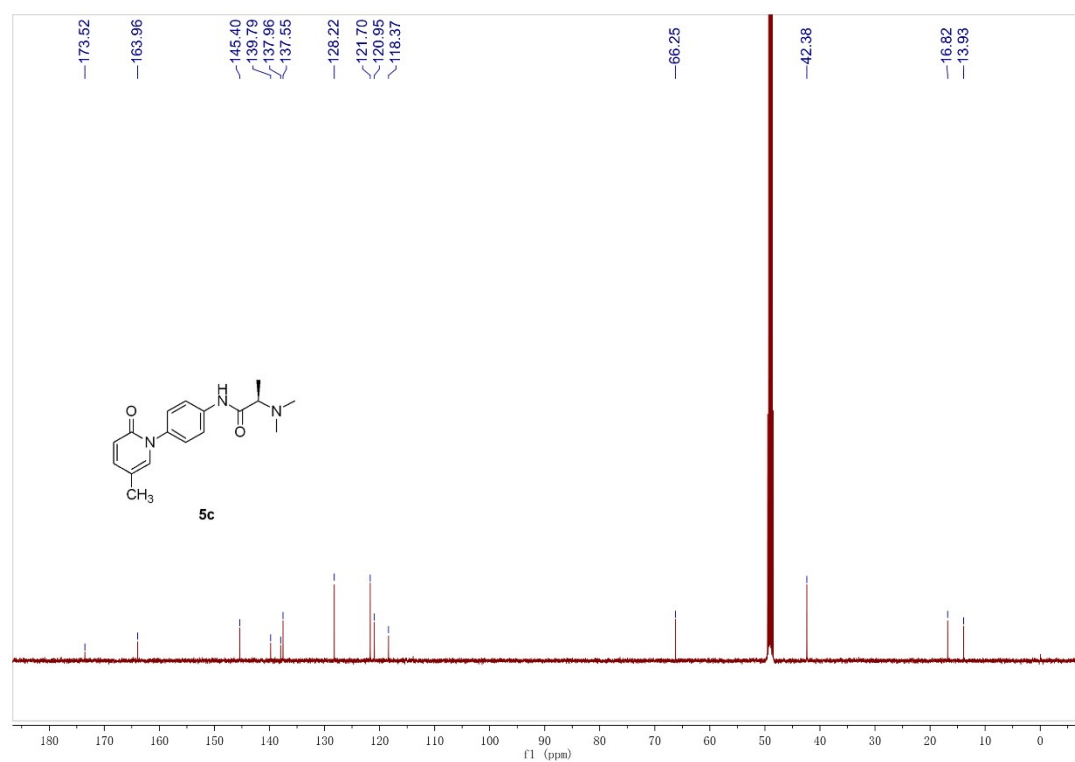

## Mass of **5c**

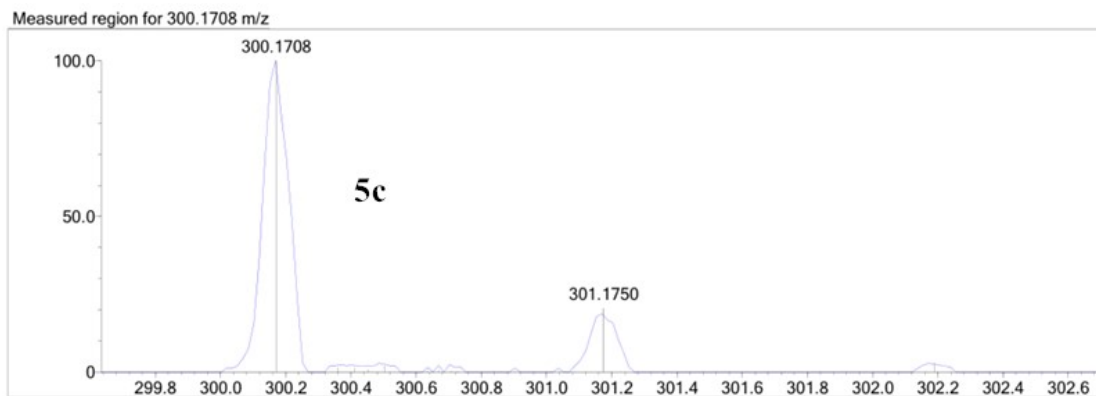

### HPLC of 5c

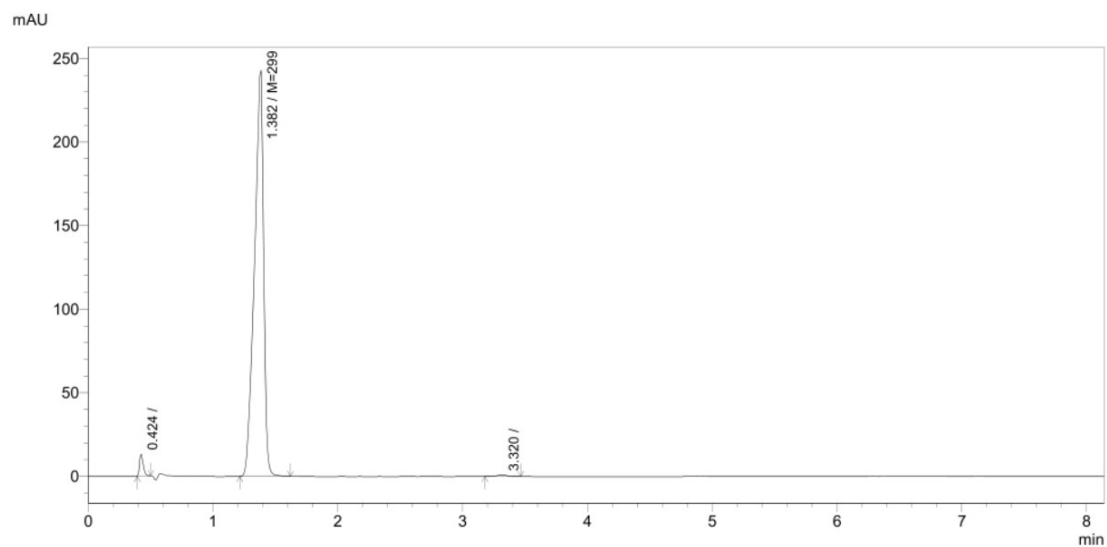

峰表

| 保留时间  | 化合物名  | 峰宽(高度 50%) | 高度     | 面积      | 面积%     | 理论塔板数(USP) | 拖尾因子  | 分离度(USP) |
|-------|-------|------------|--------|---------|---------|------------|-------|----------|
| 0.424 |       | 0.031      | 13256  | 26897   | 2.129   | 930        | 1.341 | —        |
| 1.382 | M=299 | 0.077      | 243123 | 1230946 | 97.424  | 1350       | 0.773 | 9.293    |
| 3.320 |       | 0.078      | 1055   | 5653    | 0.447   | 6938       | 1.047 | 12.511   |
|       |       |            | 257435 | 1263497 | 100.000 |            |       |          |

# $^1\text{H}$ NMR and $^{13}\text{C}$ NMR of **5d**

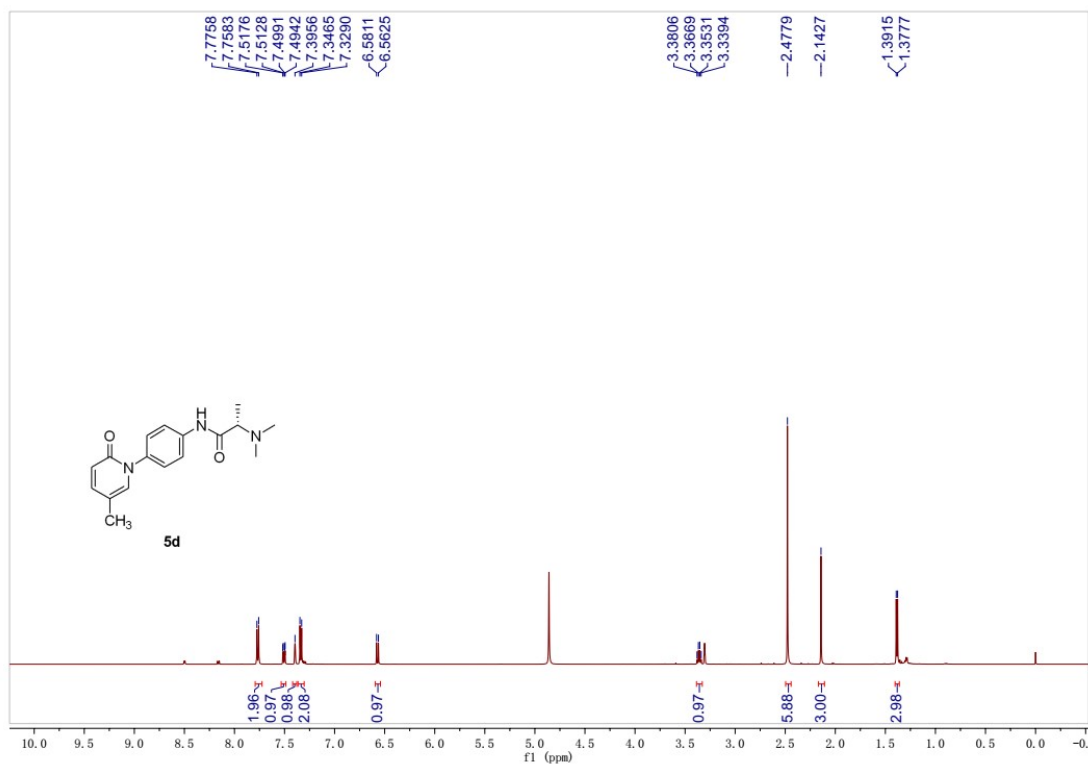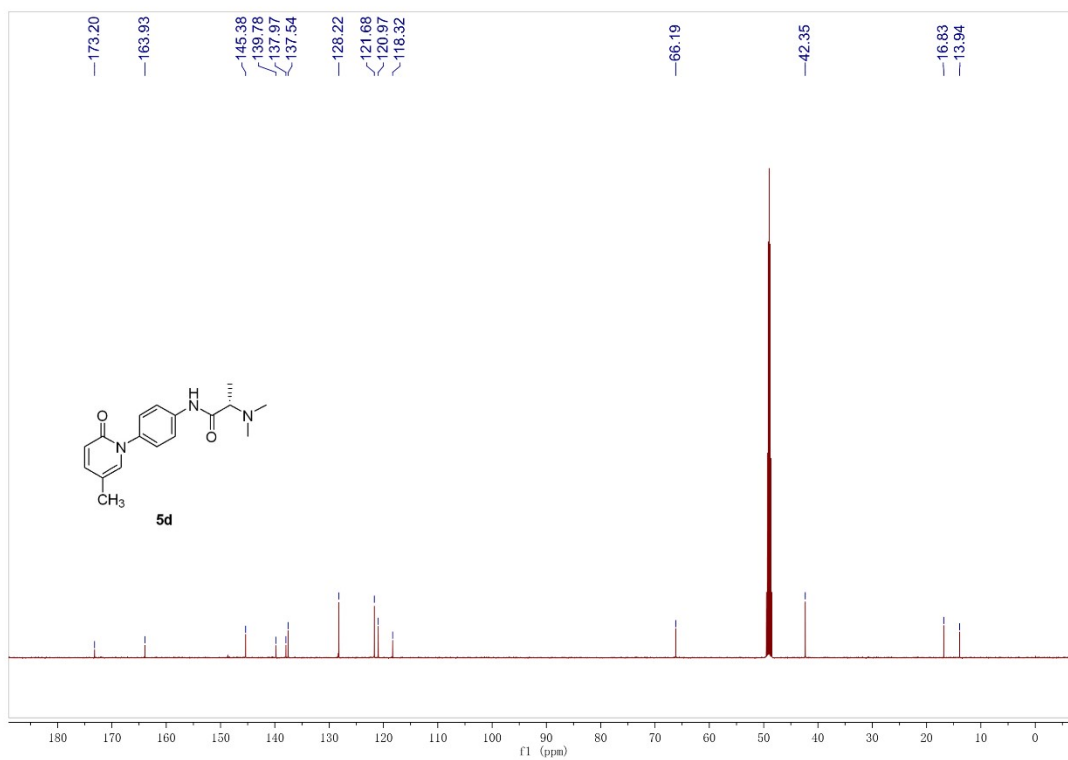

Mass of **5d**



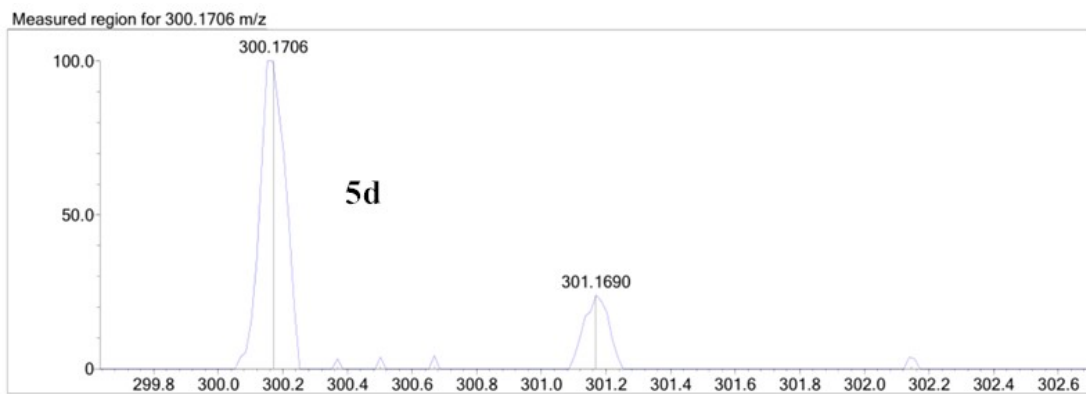

### HPLC of 5d

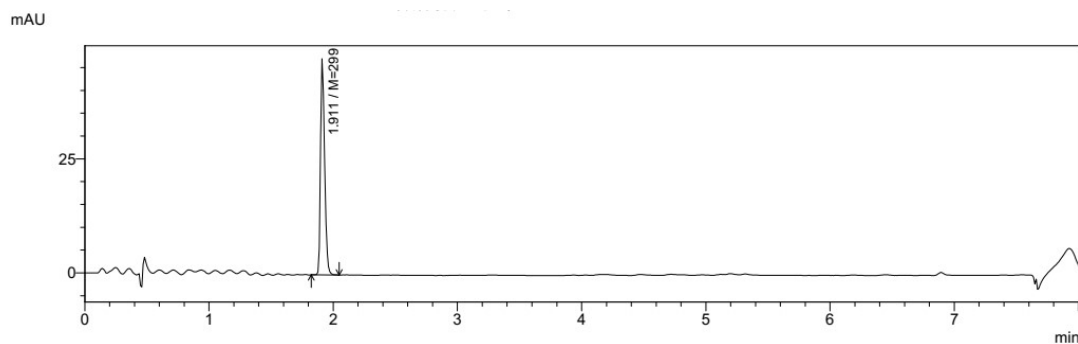

峰表

| 保留时间  | 化合物名  | 峰宽(高度 50%) | 高度    | 面积     | 面积%     | 理论塔板数(USP) | 拖尾因子  | 分离度(USP) |
|-------|-------|------------|-------|--------|---------|------------|-------|----------|
| 1.911 | M=299 | 0.035      | 47372 | 107621 | 100.000 | 11852      | 1.303 | --       |
|       |       |            | 47372 | 107621 | 100.000 |            |       |          |

### <sup>1</sup>H NMR and <sup>13</sup>C NMR of 7a

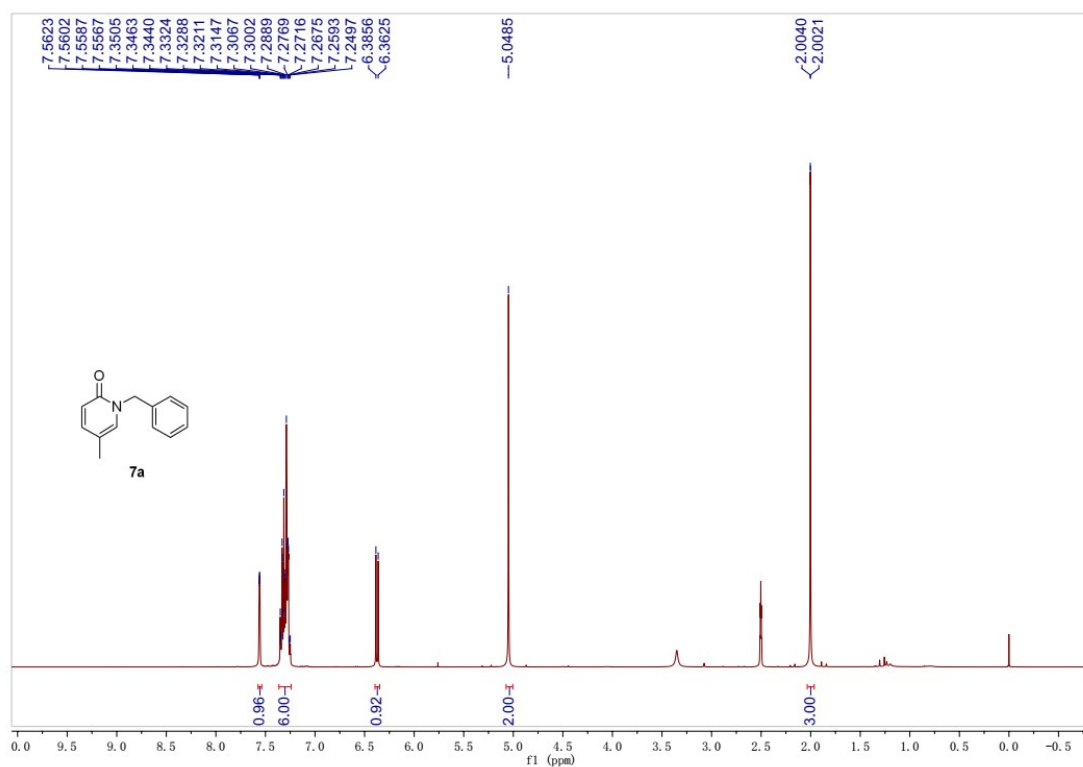

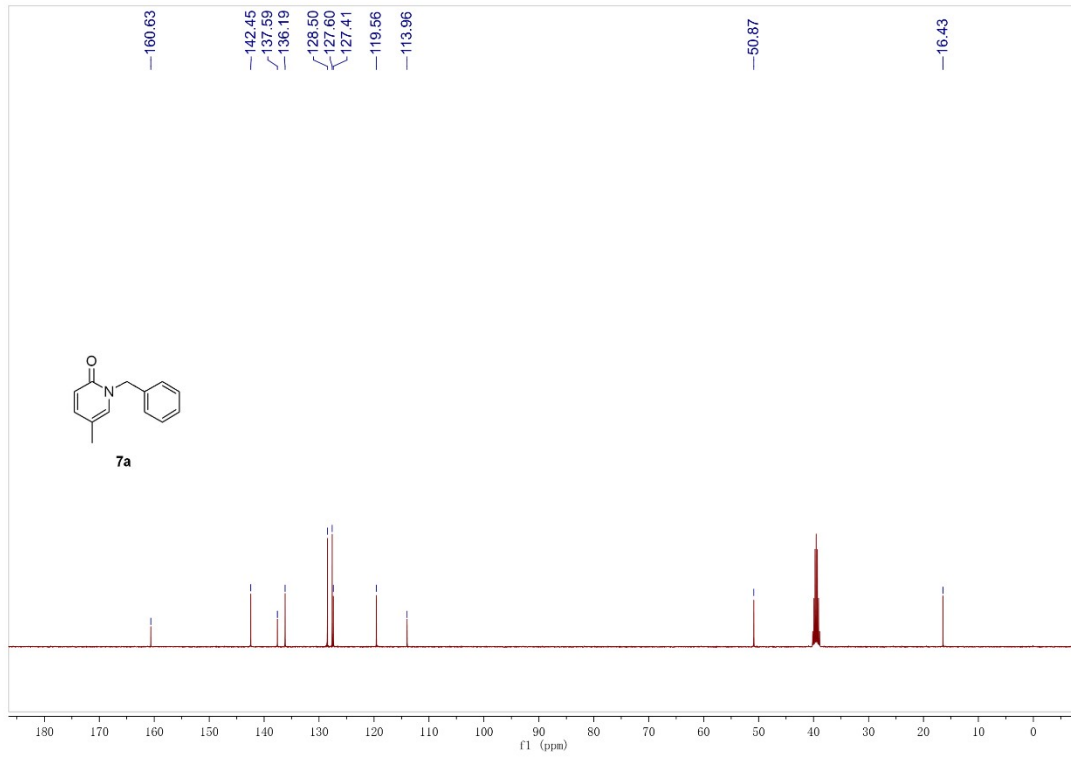

Measured region for 200.1063 m/z

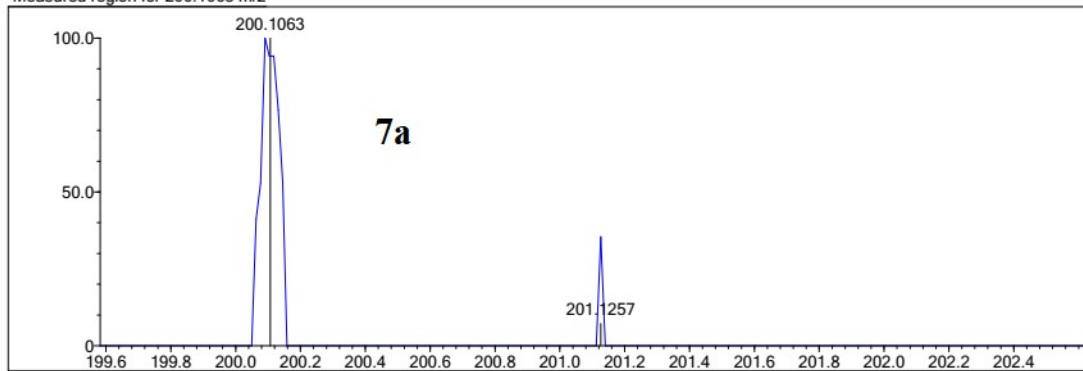

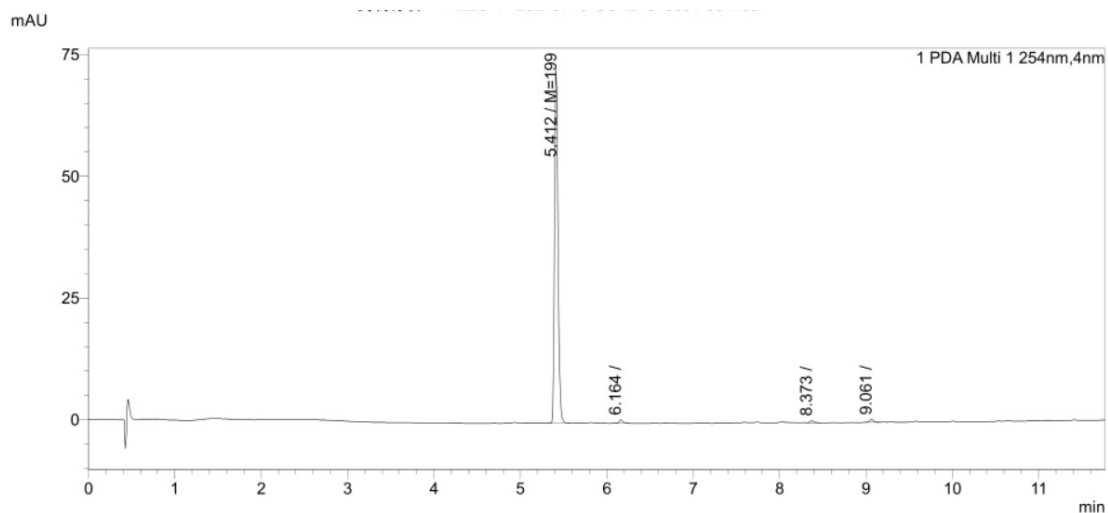

峰结果表 药物分析 - 1-1220-4 - 20210713-GCX21070901-001.kcd

| 峰号 | 保留时间  | 化合物名  | 半峰宽   | 高度 (mAU) | 面积mAU*min | 面积%   | 理论塔板数  | 分离度   | 拖尾因子 | 最小峰纯度指数              |
|----|-------|-------|-------|----------|-----------|-------|--------|-------|------|----------------------|
| 1  | 5.412 | M=199 | 0.043 | 72627    | 201777    | 97.45 | 65218  | N/A   | 1.30 | 2408                 |
| 2  | 6.164 |       | 0.041 | 711      | 1945      | 0.94  | 88020  | 8.96  | 1.37 | Cannot be calculated |
| 3  | 8.373 |       | 0.049 | 449      | 1409      | 0.68  | 118694 | 24.51 | 1.31 | Cannot be calculated |
| 4  | 9.061 |       | 0.051 | 575      | 1923      | 0.93  | 126312 | 6.91  | 1.24 | Cannot be calculated |

<sup>1</sup>H NMR and <sup>13</sup>C NMR of *7b*

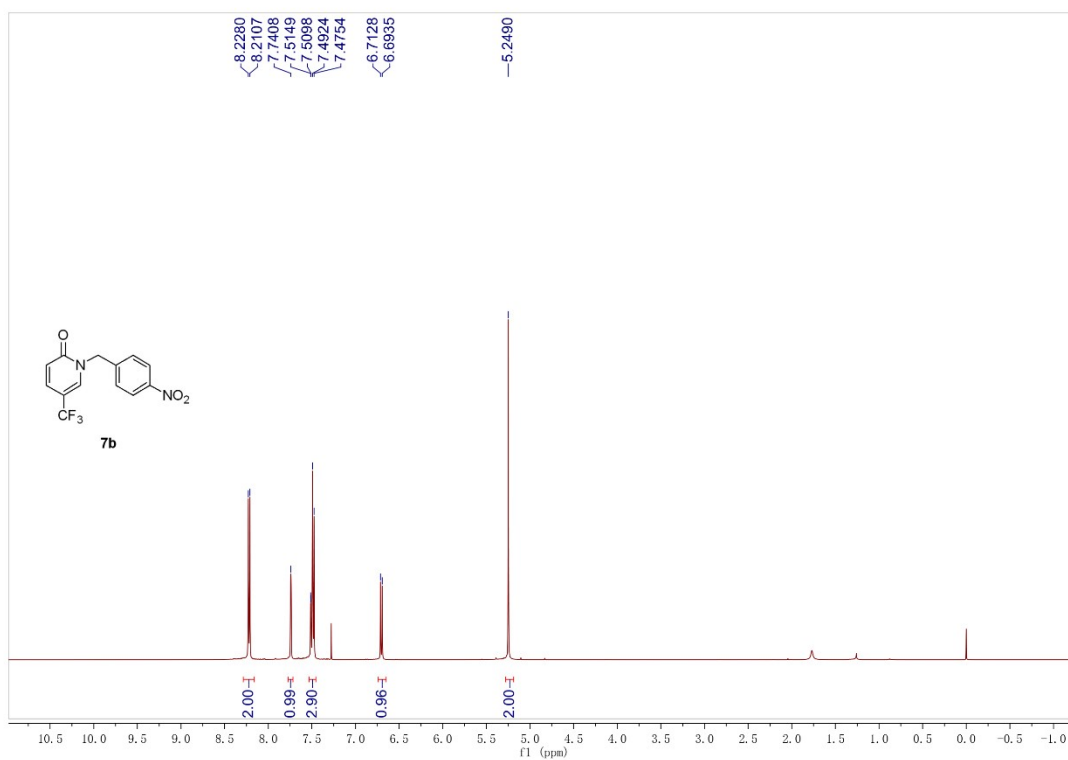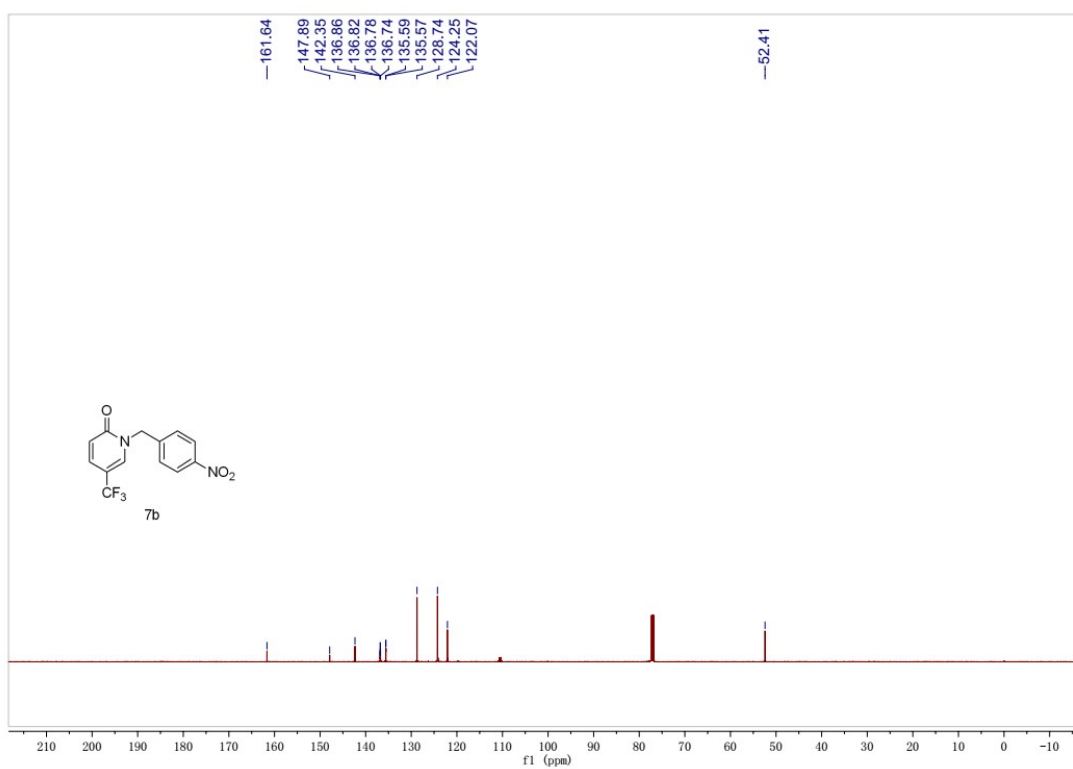

<sup>1</sup>H NMR and <sup>13</sup>C NMR of **7c**

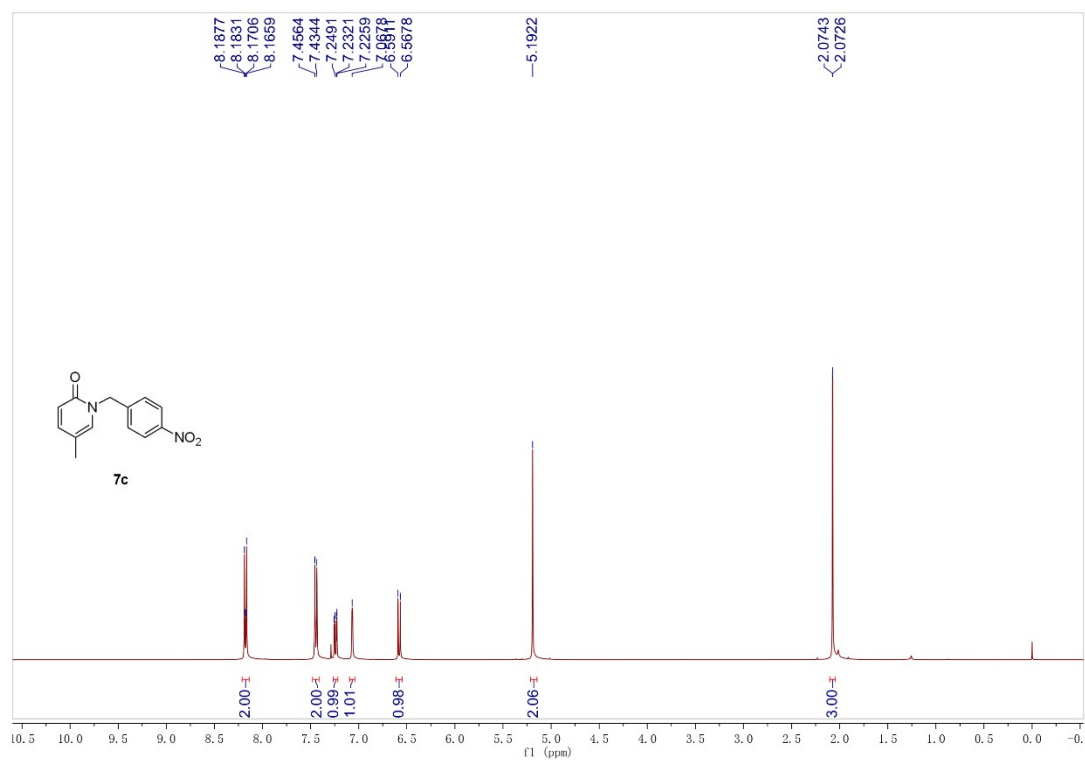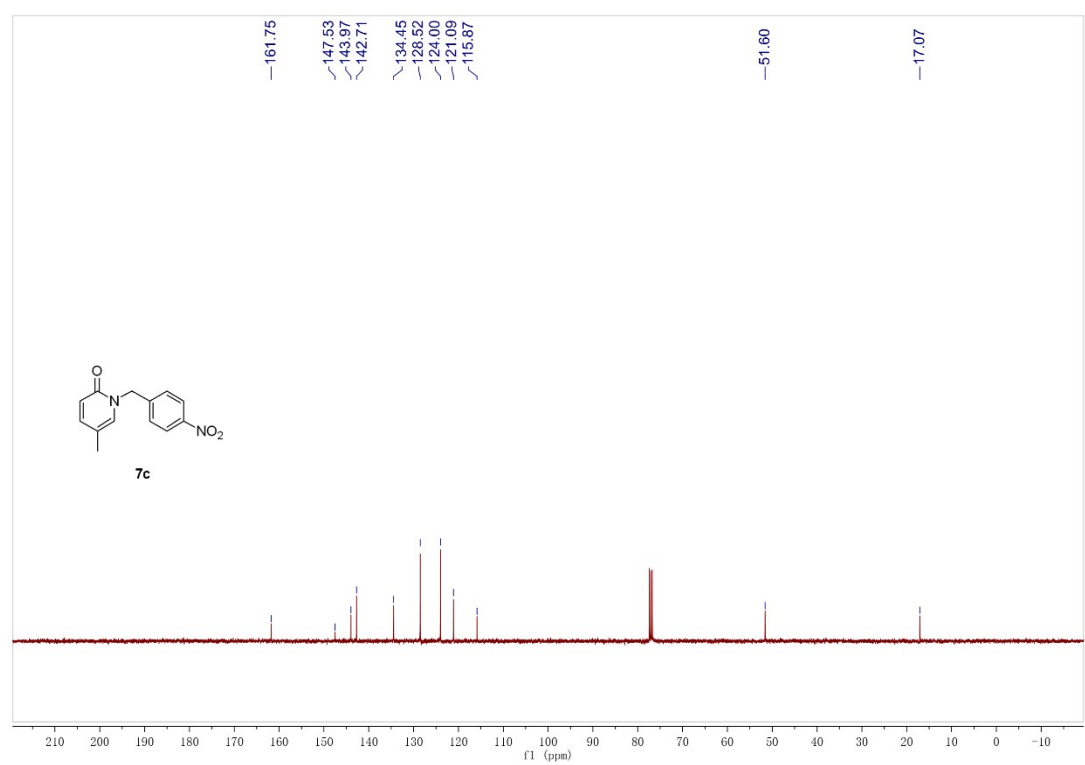

**<sup>1</sup>H NMR and <sup>13</sup>C NMR of 8a**

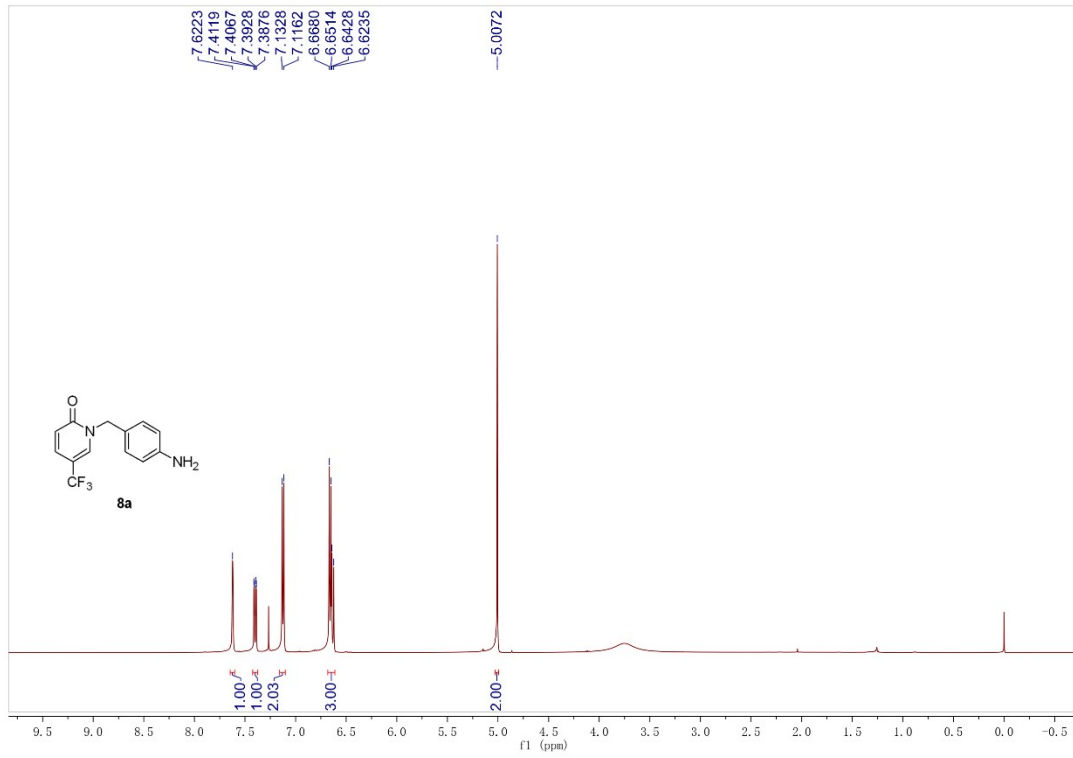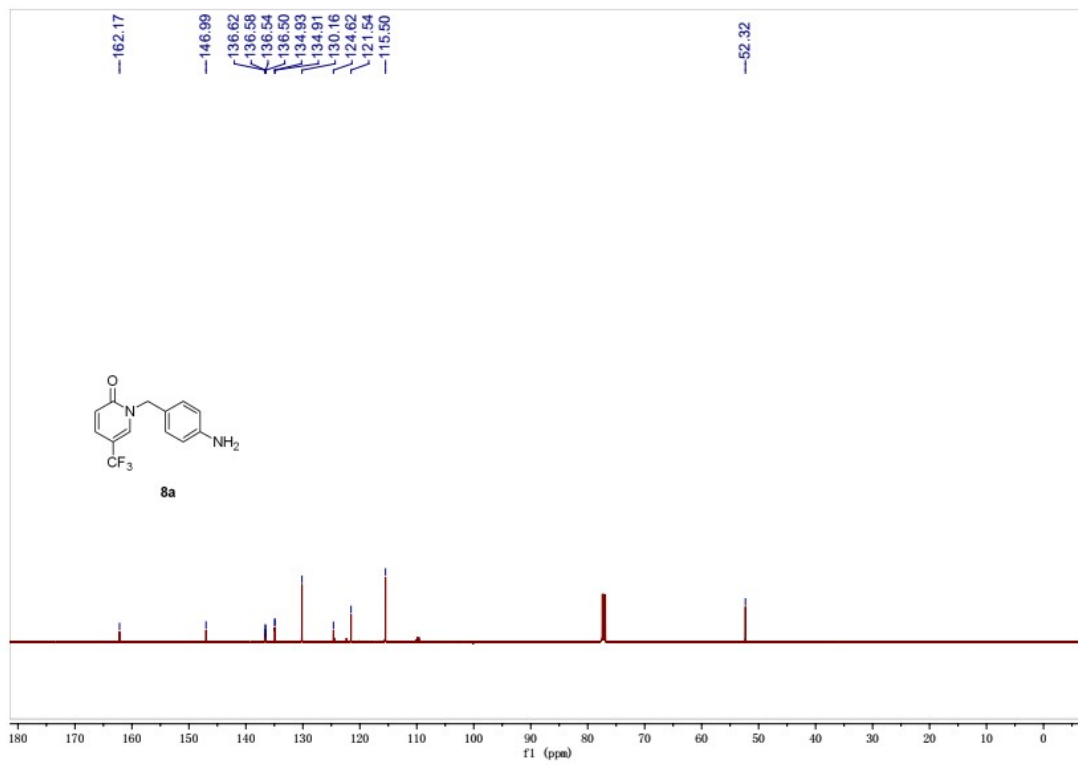

**<sup>1</sup>H NMR and <sup>13</sup>C NMR of 8b**

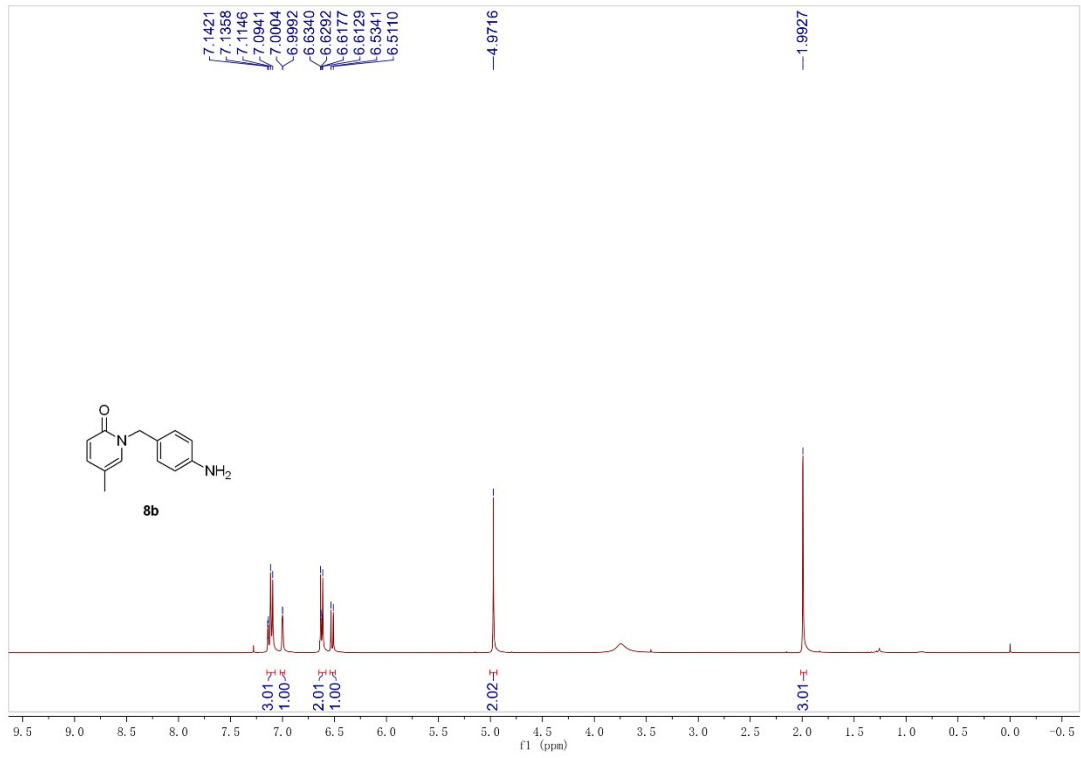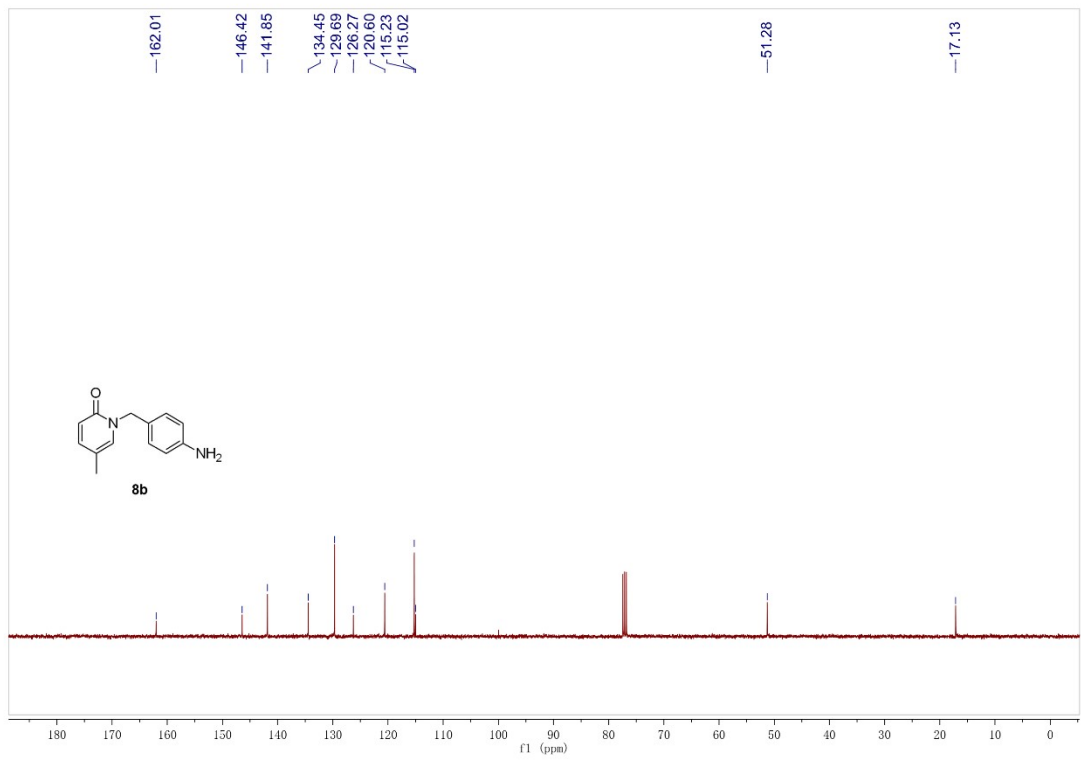

<sup>1</sup>H NMR and <sup>13</sup>C NMR of **9a**

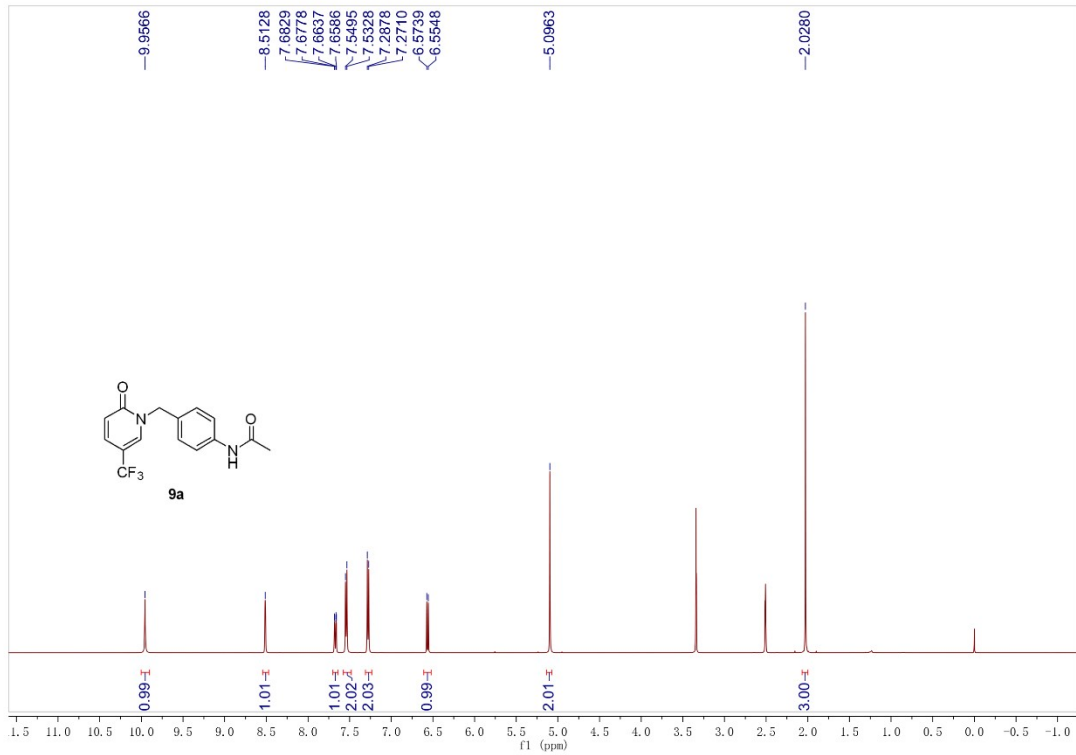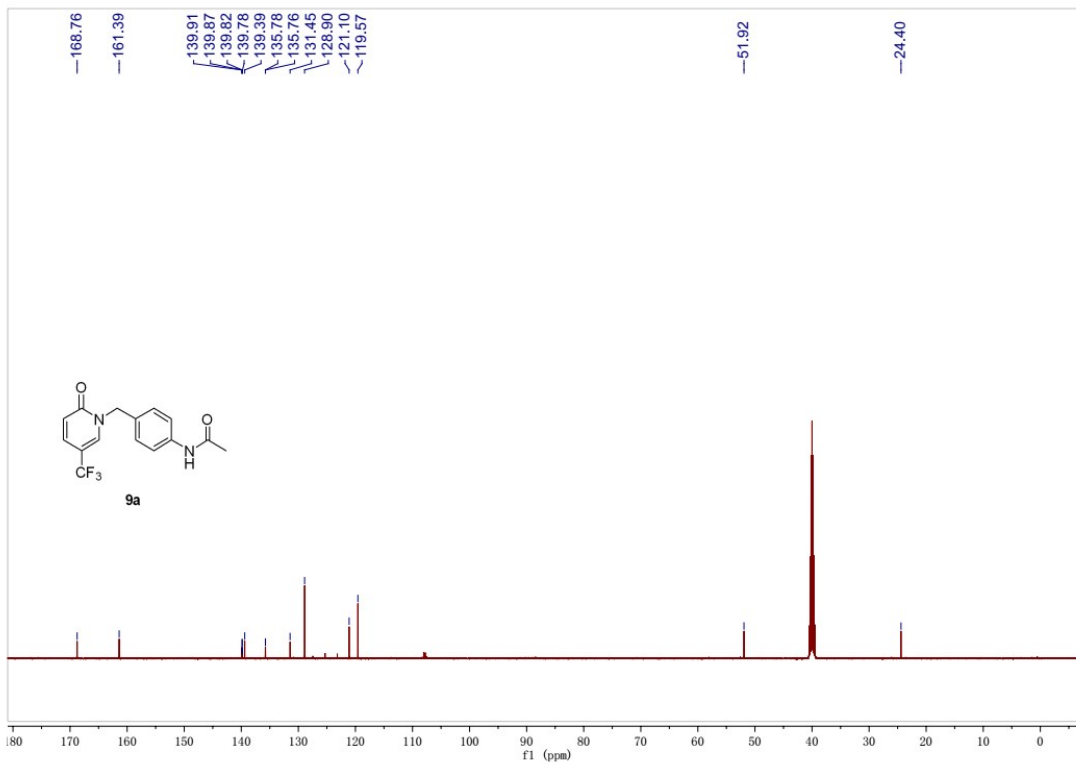

Mass of **9a**



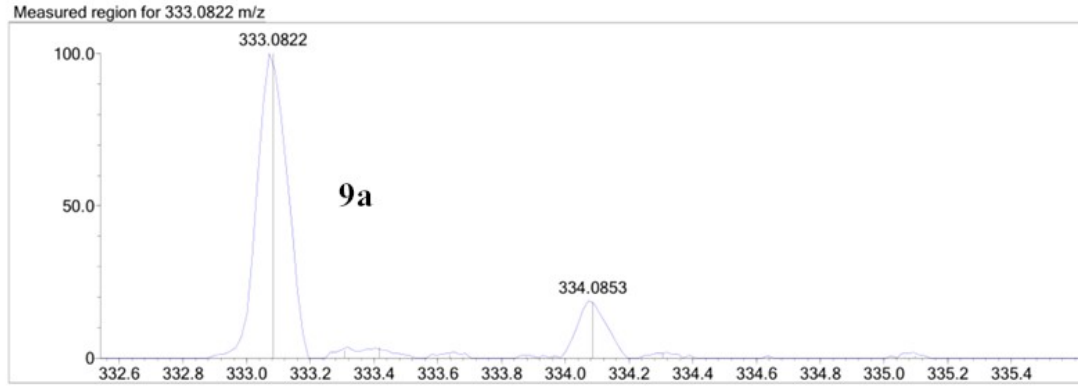

## HPLC of 9a

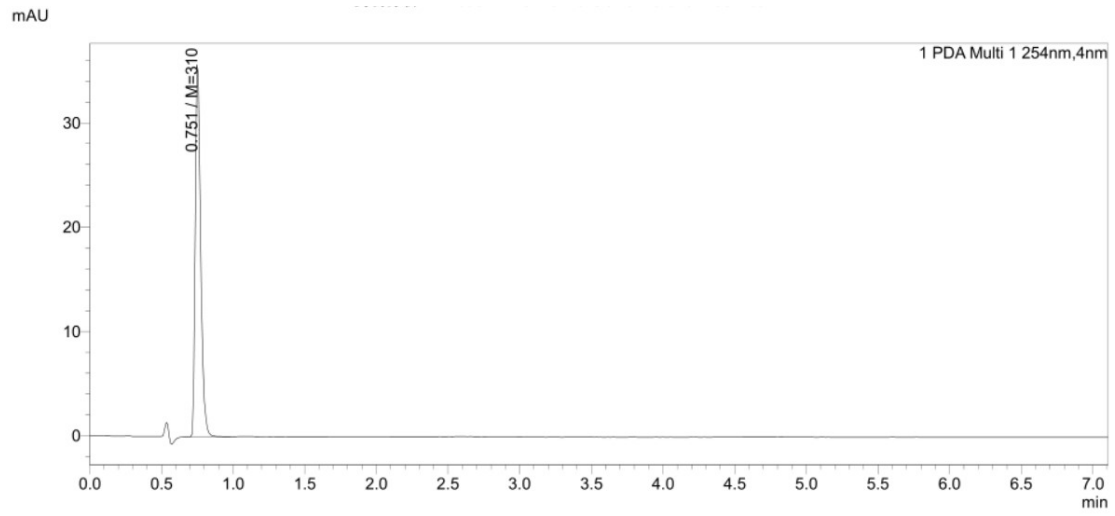

峰结果表 药物分析 - 1-1395-2 - 20210729-GCX0728-310-2-001.lcd

| 峰号 | 保留时间  | 化合物名  | 半峰宽   | 高度 (mAU) | 面积mAU*min | 面积%    | 理论塔板数 | 分离度 | 拖尾因子 | 最小峰纯度指数        |
|----|-------|-------|-------|----------|-----------|--------|-------|-----|------|----------------|
| 1  | 0.751 | M=310 | 0.040 | 35678    | 94773     | 100.00 | 1428  | N/A | 1.37 | Not calculated |

# $^1\text{H}$ NMR and $^{13}\text{C}$ NMR of **9b**

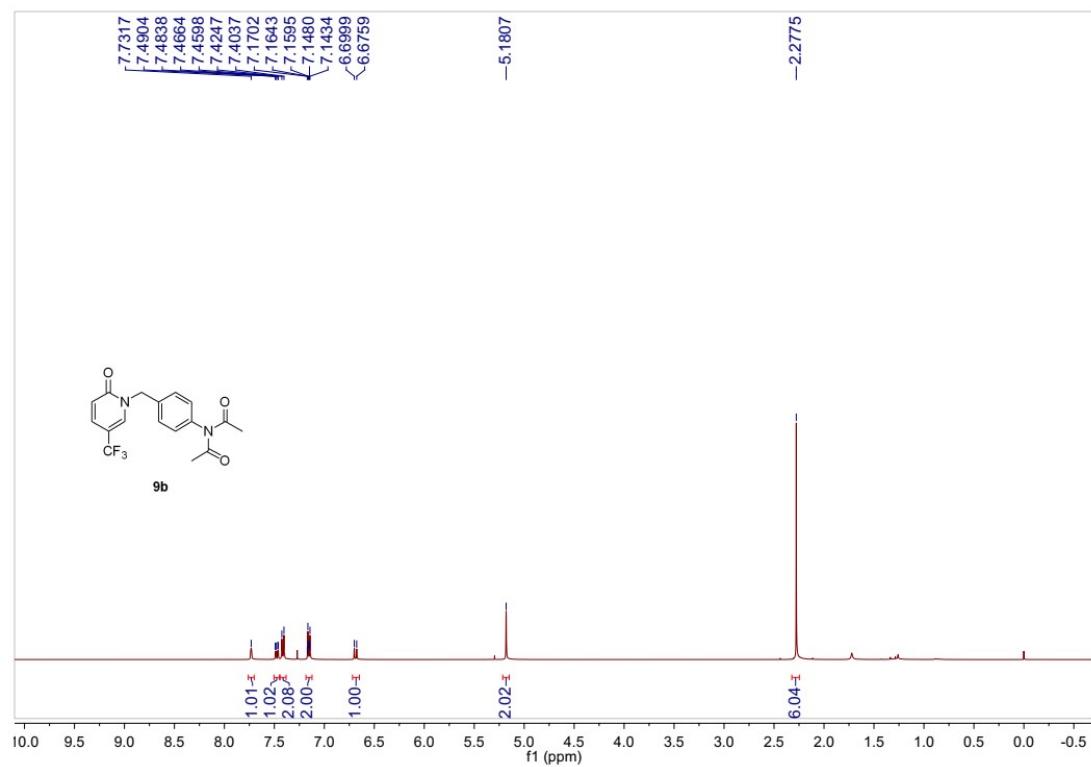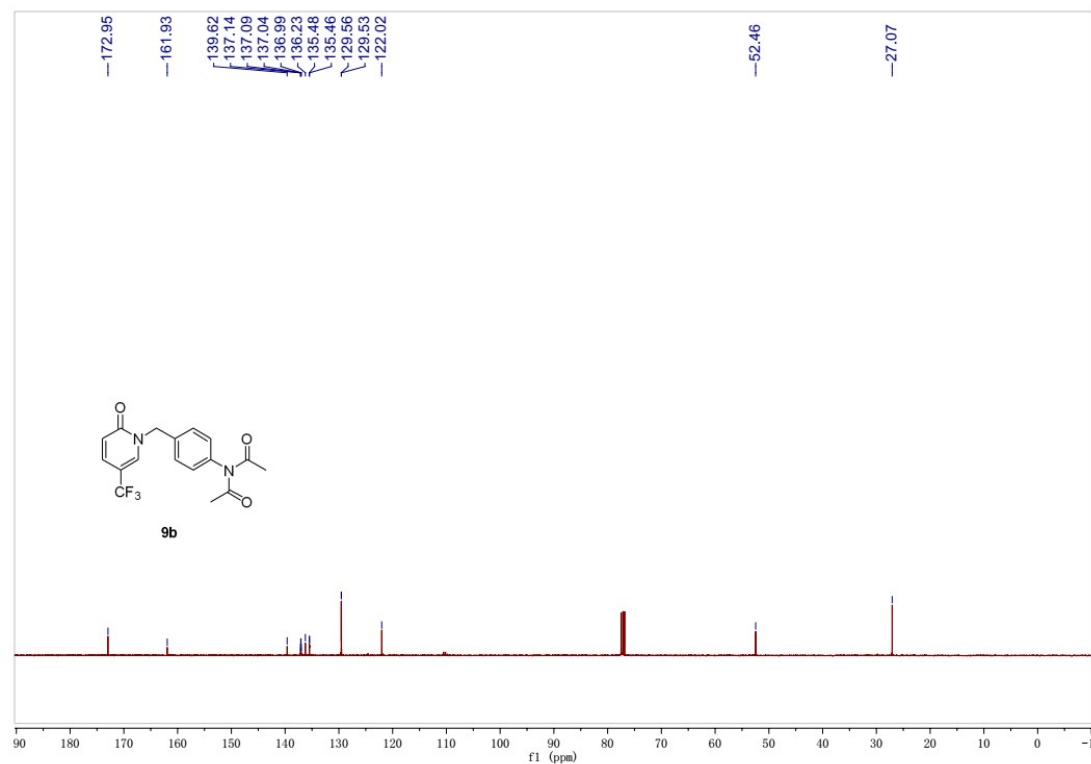

## Mass of **9b**

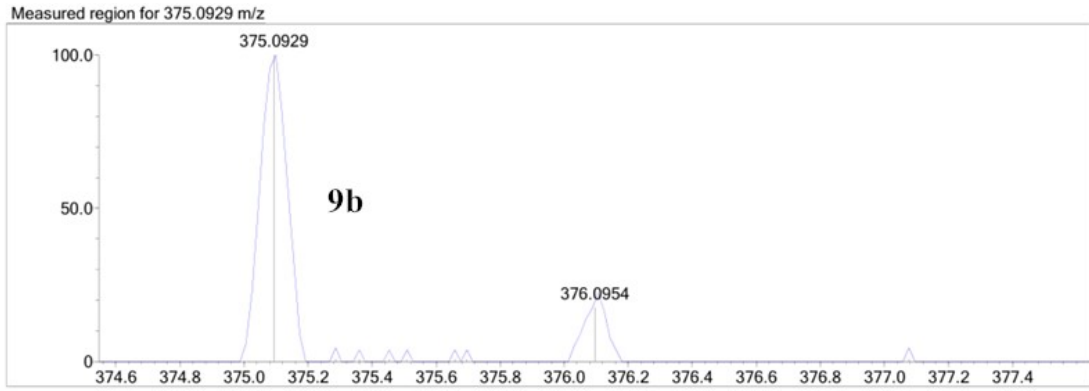

## HPLC of 9b

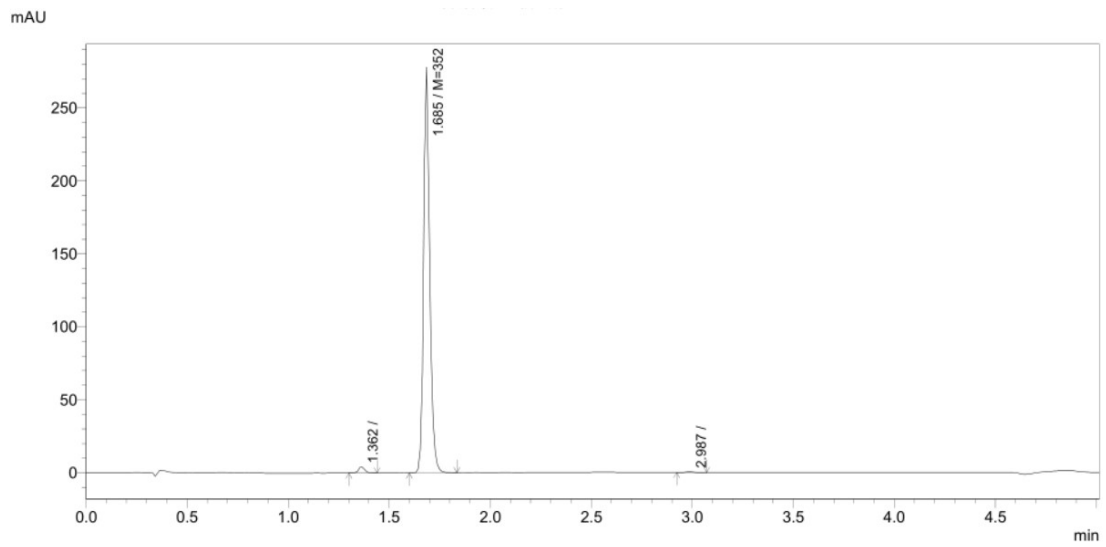

峰表

| 保留时间  | 化合物名  | 峰宽(高度 50%) | 高度     | 面积     | 面积%     | 理论塔板数(USP) | 拖尾因子  | 分离度(USP) |
|-------|-------|------------|--------|--------|---------|------------|-------|----------|
| 1.362 |       | 0.033      | 4218   | 9342   | 1.569   | 7339       | 1.166 | --       |
| 1.685 | M=352 | 0.032      | 278141 | 584975 | 98.245  | 11327      | 1.158 | 5.077    |
| 2.987 |       | 0.041      | 409    | 1105   | 0.186   | 20346      | 1.058 | 17.710   |
|       |       |            | 282768 | 595422 | 100.000 |            |       |          |

$^1\text{H}$  NMR and  $^{13}\text{C}$  NMR of **9c**

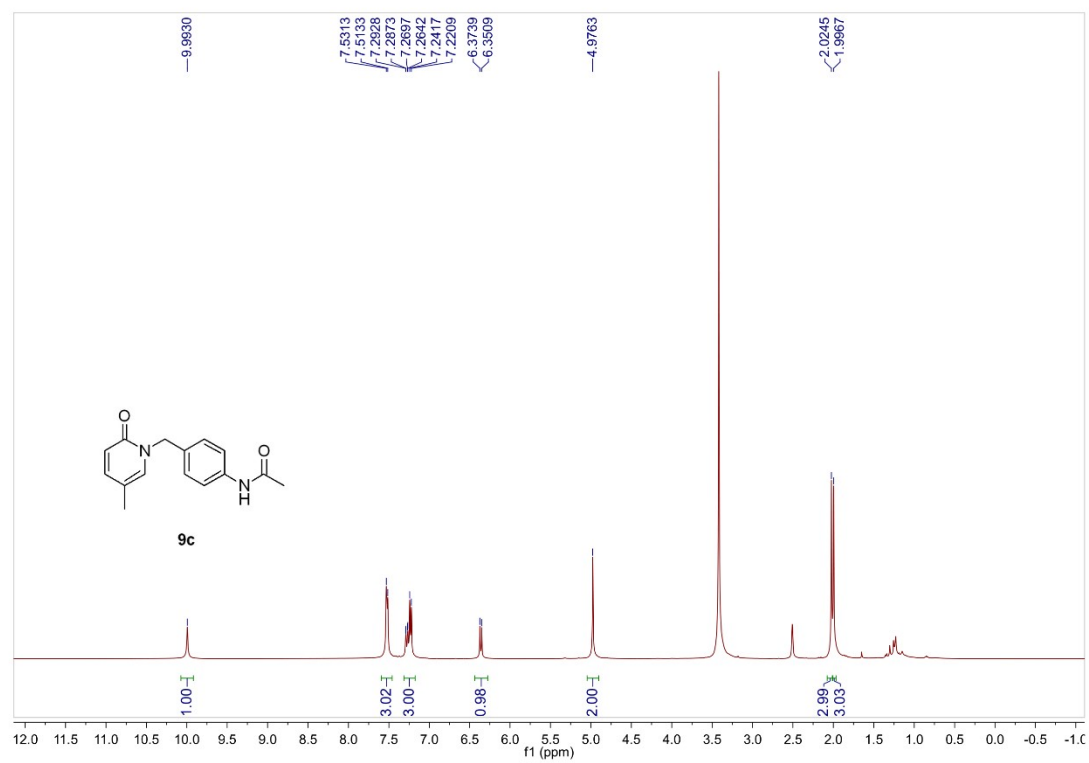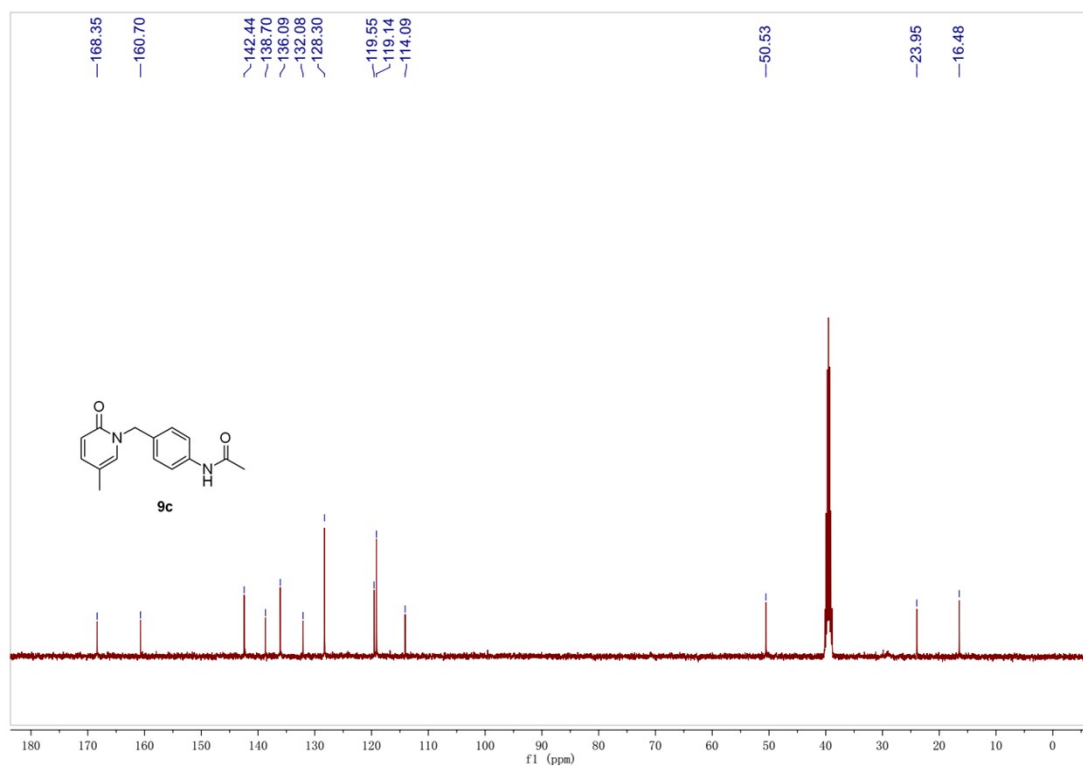

# $^1\text{H}$ NMR and $^{13}\text{C}$ NMR of **9d**

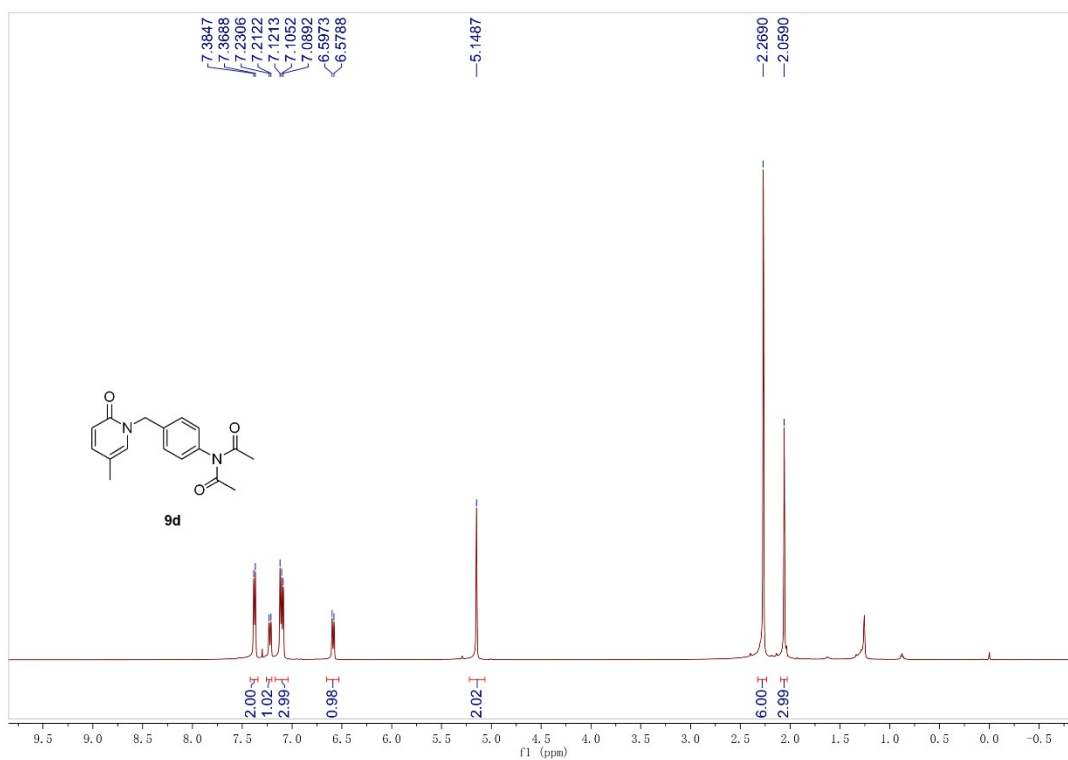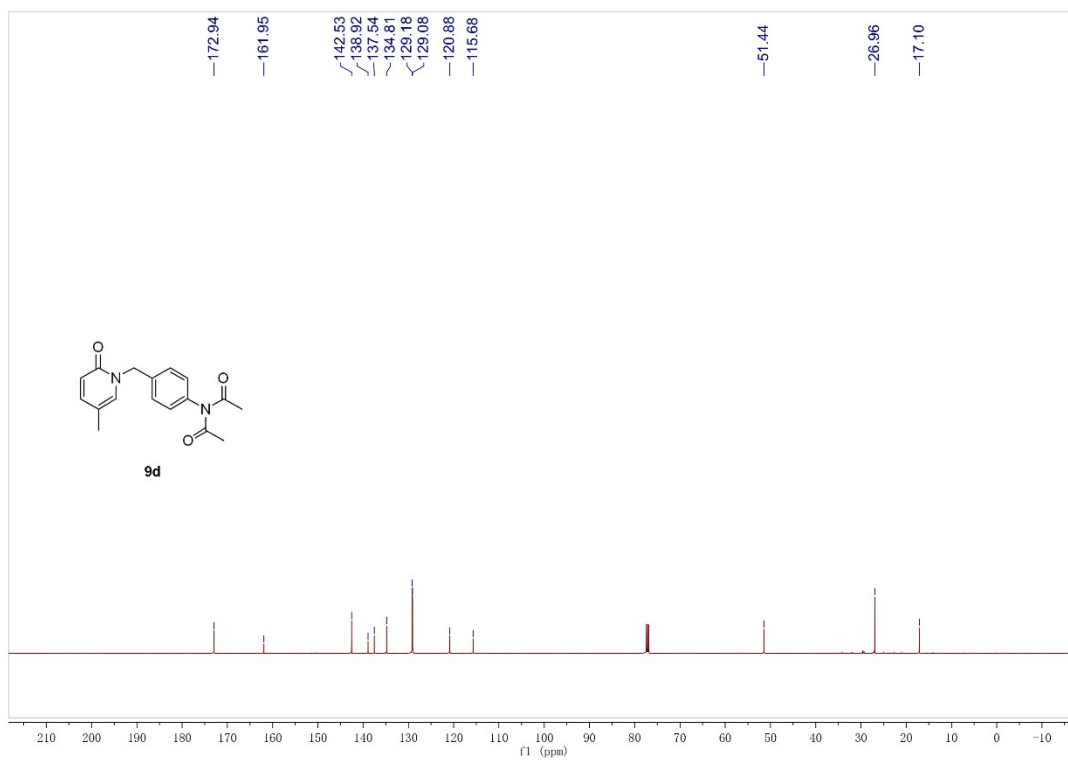

## Mass of **9d**

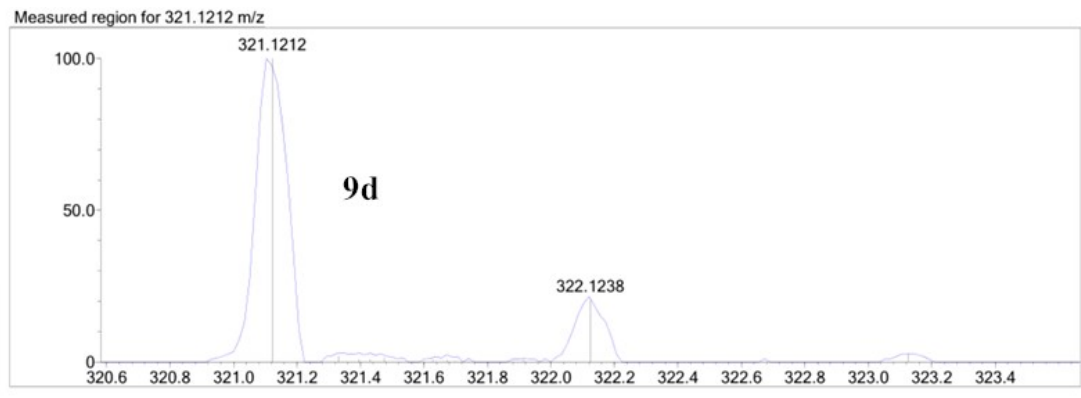

**HPLC of 9d**

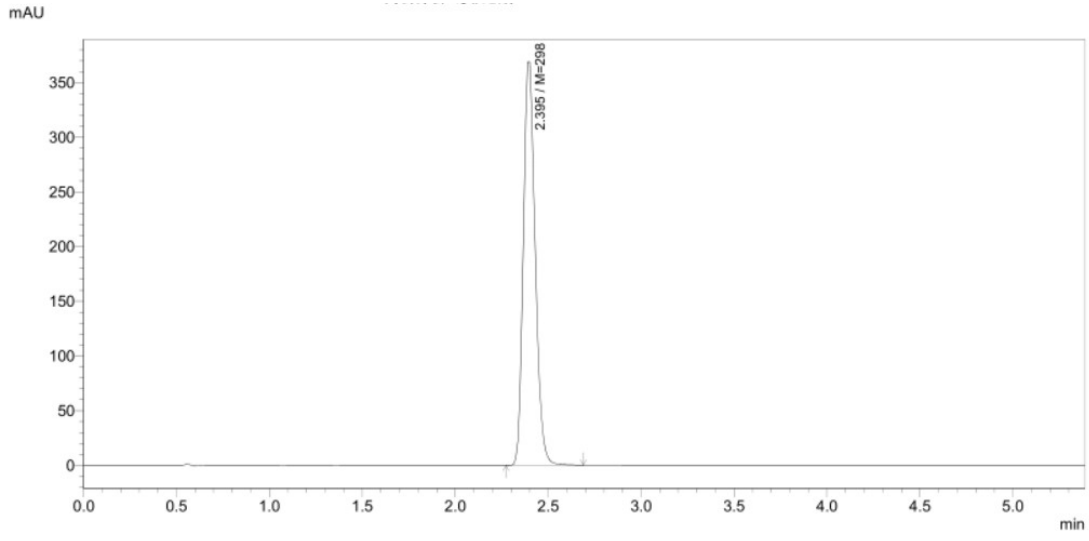

峰表

| 保留时间  | 化合物名  | 峰宽(高度 50%) | 高度     | 面积      | 面积%     | 理论塔板数(USP) | 拖尾因子  | 分离度(USP) |
|-------|-------|------------|--------|---------|---------|------------|-------|----------|
| 2.395 | M=298 | 0.068      | 368902 | 1638048 | 100.000 | 5137       | 1.200 | --       |
|       |       |            | 368902 | 1638048 | 100.000 |            |       |          |

$^1\text{H}$  NMR and  $^{13}\text{C}$  NMR of **10a**

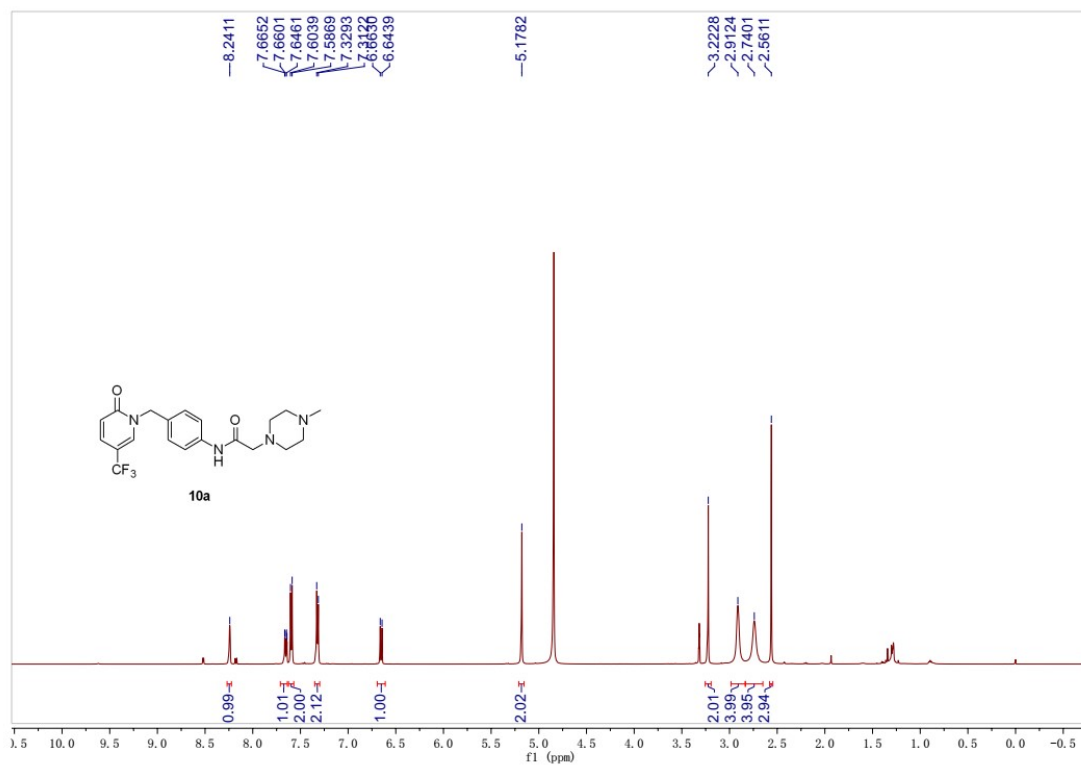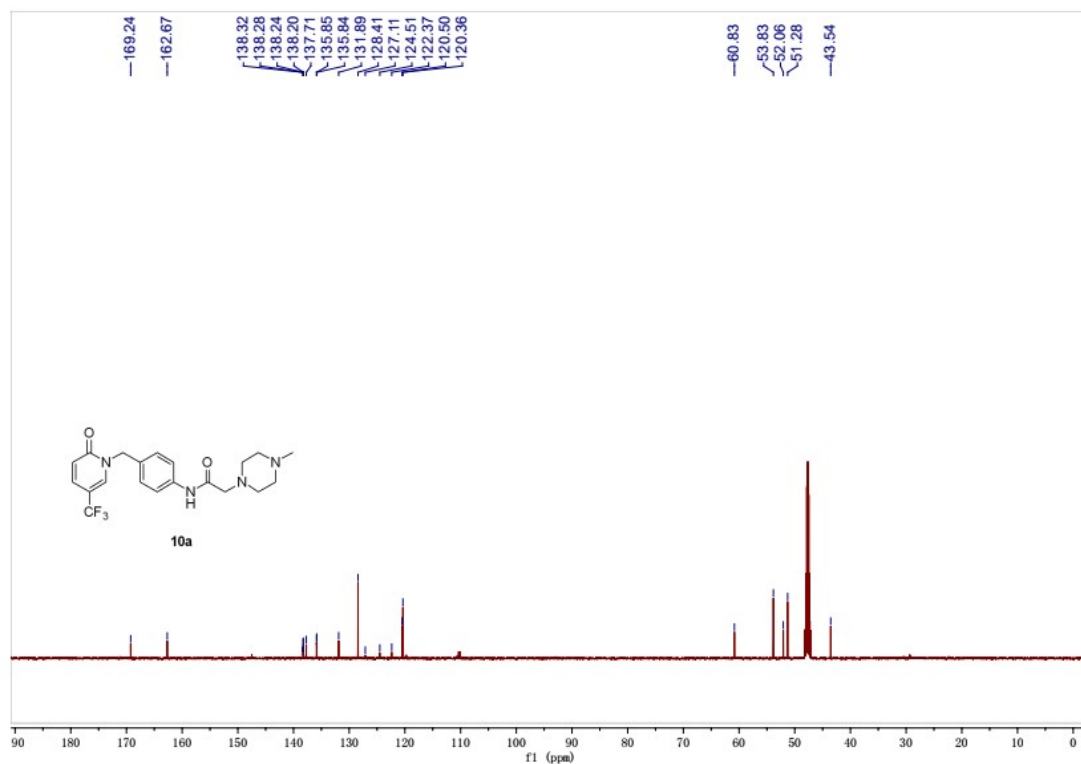

Mass of **10a**

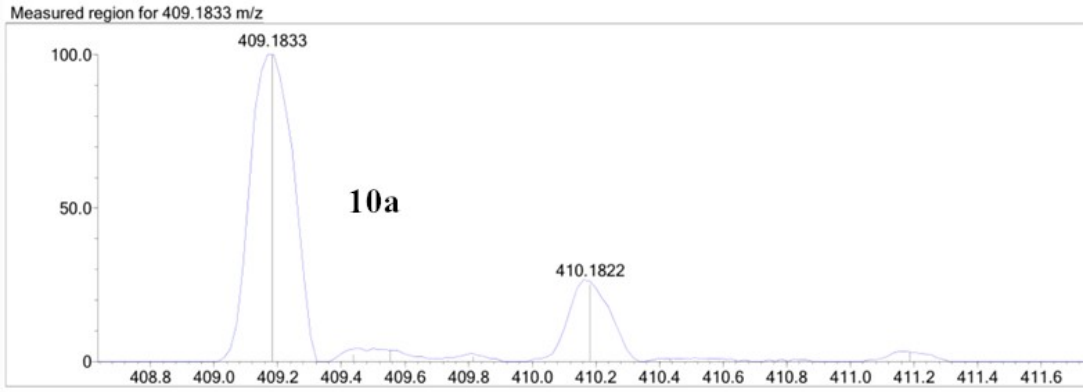

### HPLC of 10a

mAU

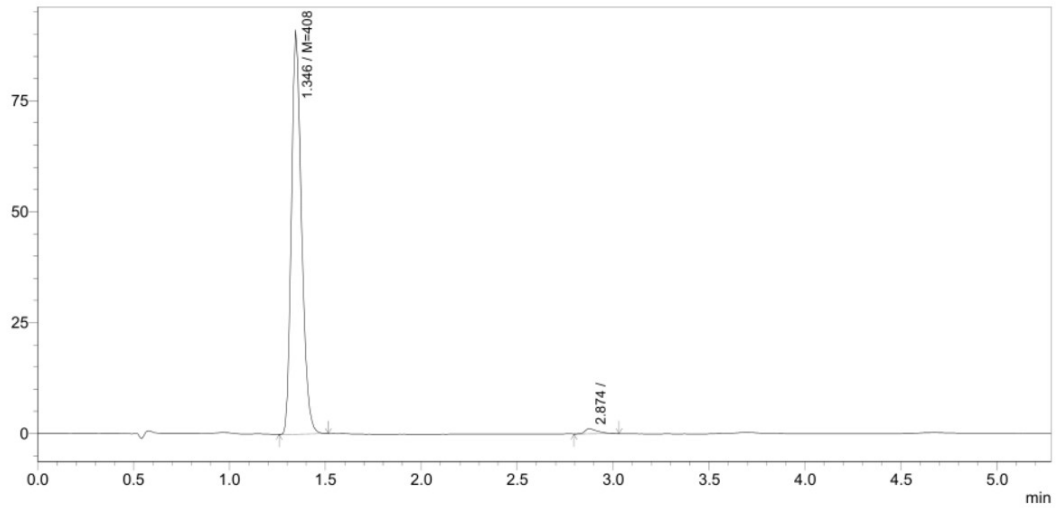

峰表

| 保留时间  | 化合物名  | 峰宽 (高度 50%) | 高度    | 面积     | 面积%    | 理论塔板数 (USP) | 拖尾因子  | 分离度 (USP) |
|-------|-------|-------------|-------|--------|--------|-------------|-------|-----------|
| 1.346 | M=408 | 0.056       | 91140 | 334346 | 98.385 | 2232        | 1.246 | —         |
| 2.874 |       | 0.069       | 1178  | 5487   | 1.615  | 6836        | 1.842 | 12.082    |



# $^1\text{H}$ NMR and $^{13}\text{C}$ NMR of **10b**

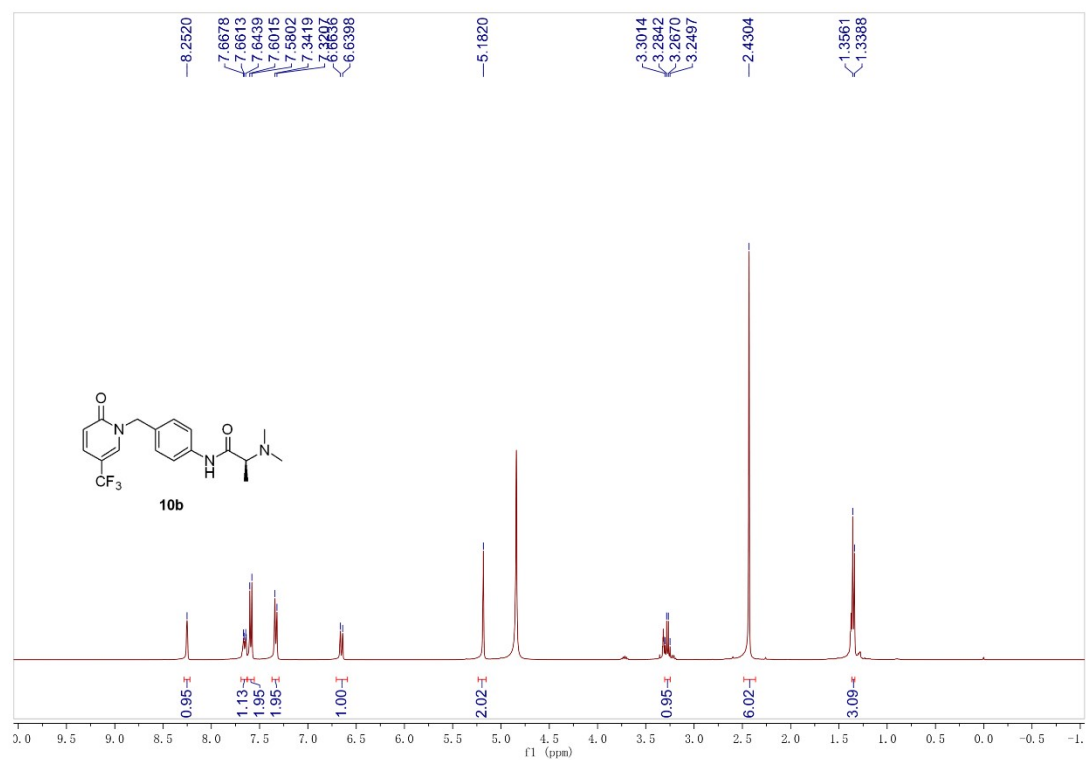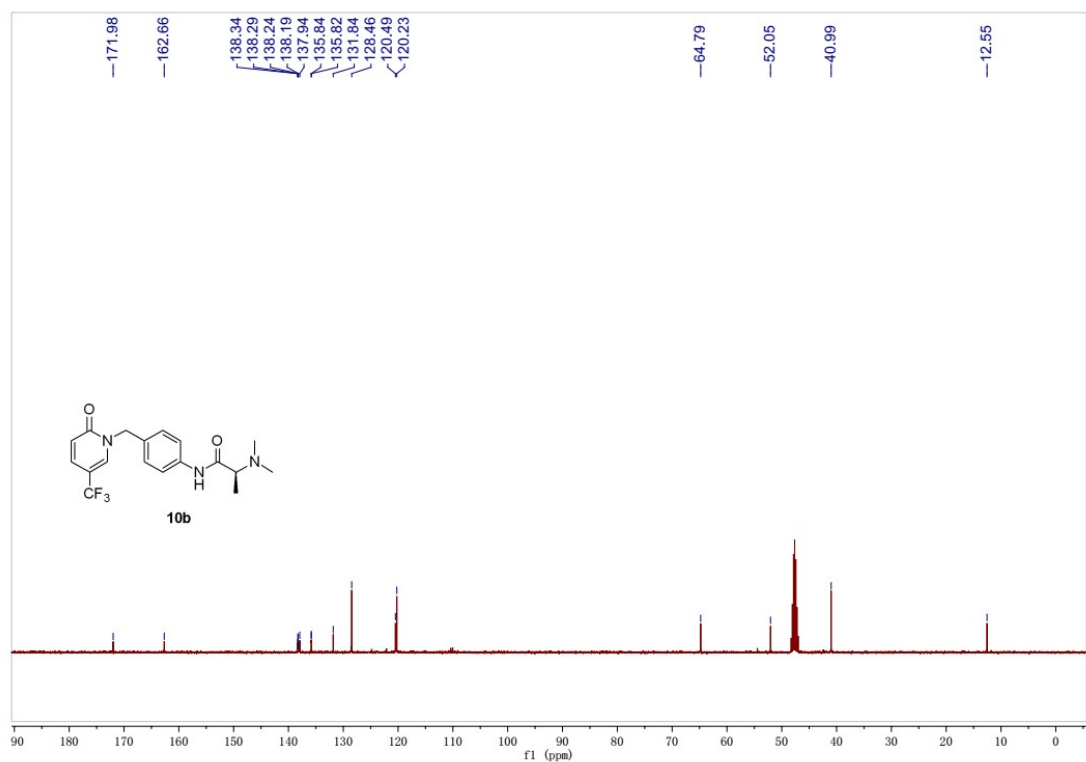

## Mass of **10b**

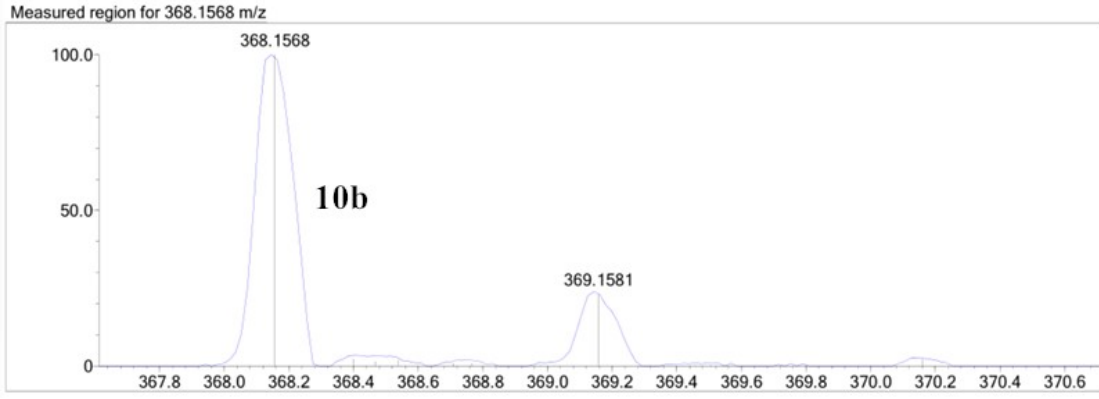

### HPLC of 10b

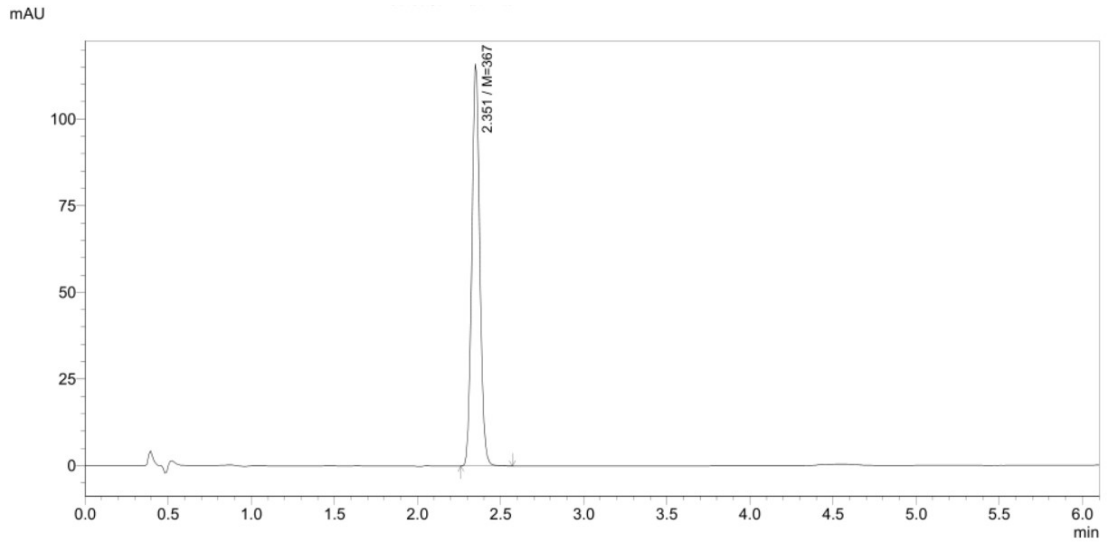

峰表

| 保留时间  | 化合物名  | 峰宽(高度 50%) | 高度     | 面积     | 面积%     | 理论塔板数(USP) | 拖尾因子  | 分离度(USP) |
|-------|-------|------------|--------|--------|---------|------------|-------|----------|
| 2.351 | M=367 | 0.051      | 116138 | 386711 | 100.000 | 8656       | 1.063 | —        |
|       |       |            | 116138 | 386711 | 100.000 |            |       |          |

# $^1\text{H}$ NMR and $^{13}\text{C}$ NMR of **10c**

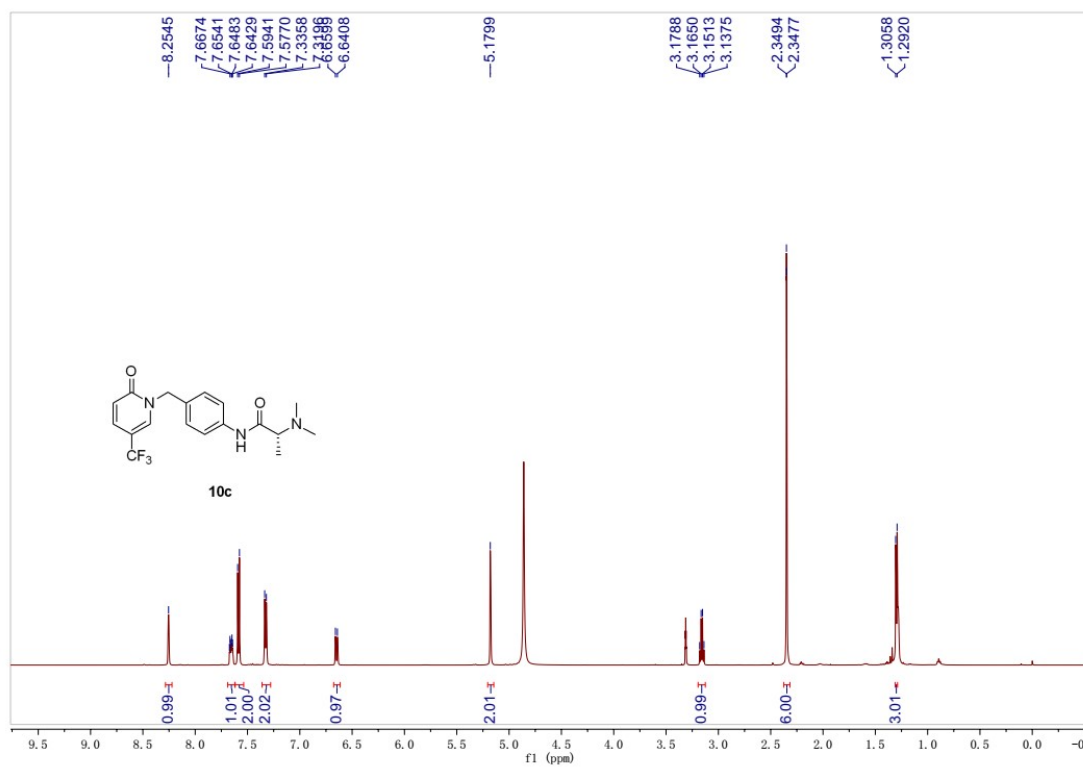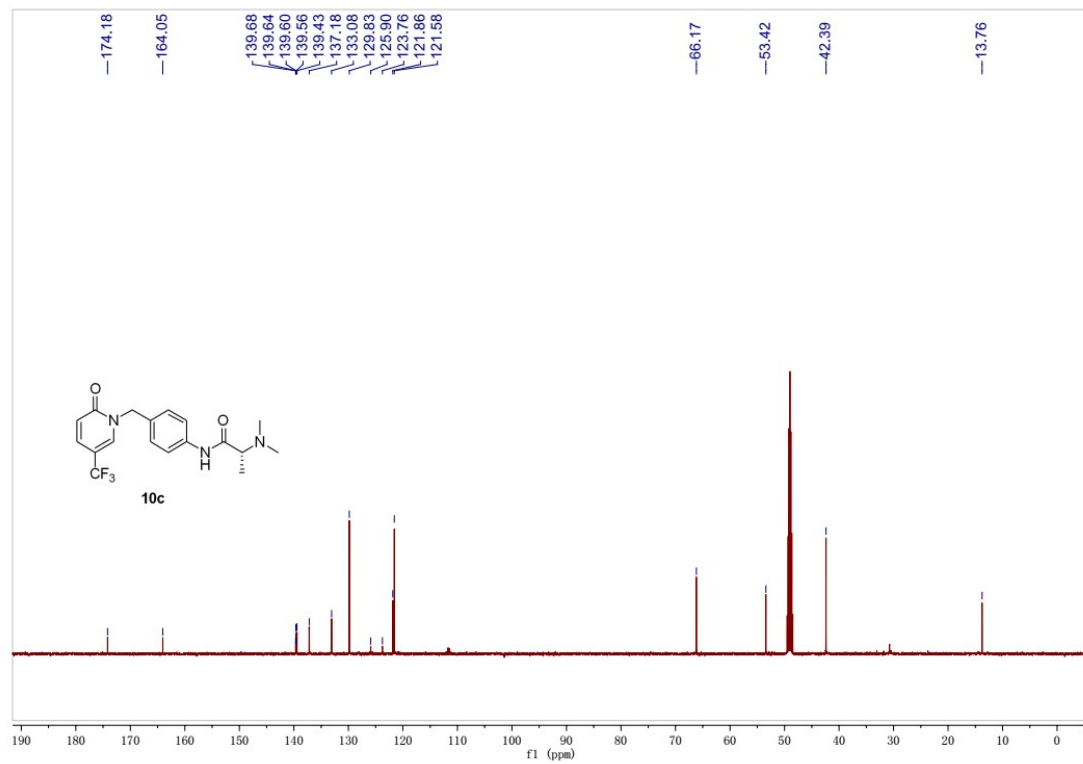

## Mass of **10c**

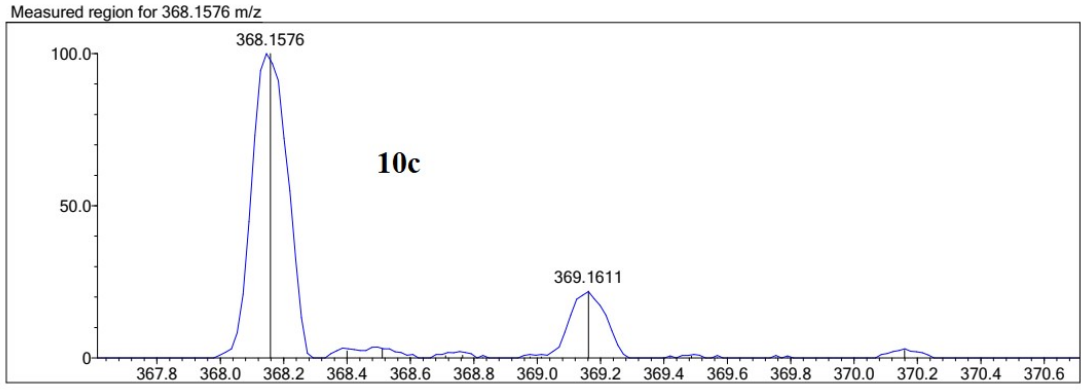

### HPLC of 10c

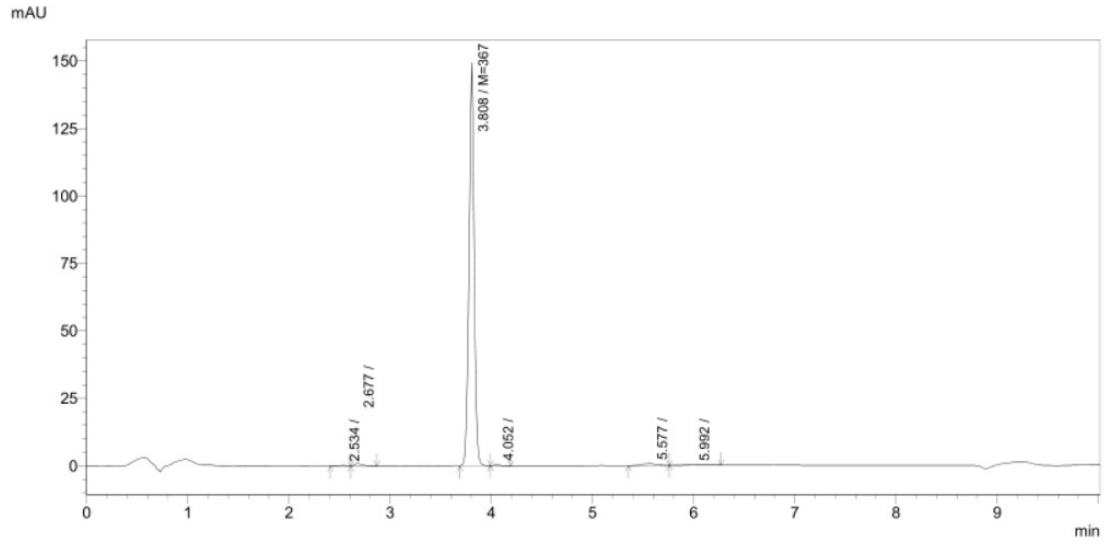

峰表

| 保留时间  | 化合物名  | 峰宽(高度 50%) | 高度     | 面积     | 面积%     | 理论塔板数(USP) | 拖尾因子  | 分离度(USP) |
|-------|-------|------------|--------|--------|---------|------------|-------|----------|
| 2.534 |       | 0.078      | 344    | 1746   | 0.315   | 4325       | --    | --       |
| 2.677 |       | 0.089      | 1010   | 5728   | 1.034   | 3906       | --    | 0.879    |
| 3.808 | M=367 | 0.054      | 149568 | 535555 | 96.687  | 18404      | 0.963 | 7.970    |
| 4.052 |       | 0.054      | 582    | 2267   | 0.409   | 20656      | --    | 2.176    |
| 5.577 |       | 0.156      | 657    | 6677   | 1.205   | 7506       | --    | 8.235    |
| 5.992 |       | 0.170      | 139    | 1934   | 0.349   | 5257       | --    | 1.411    |
|       |       |            | 152300 | 553906 | 100.000 |            |       |          |

# $^1\text{H}$ NMR and $^{13}\text{C}$ NMR of **10d**

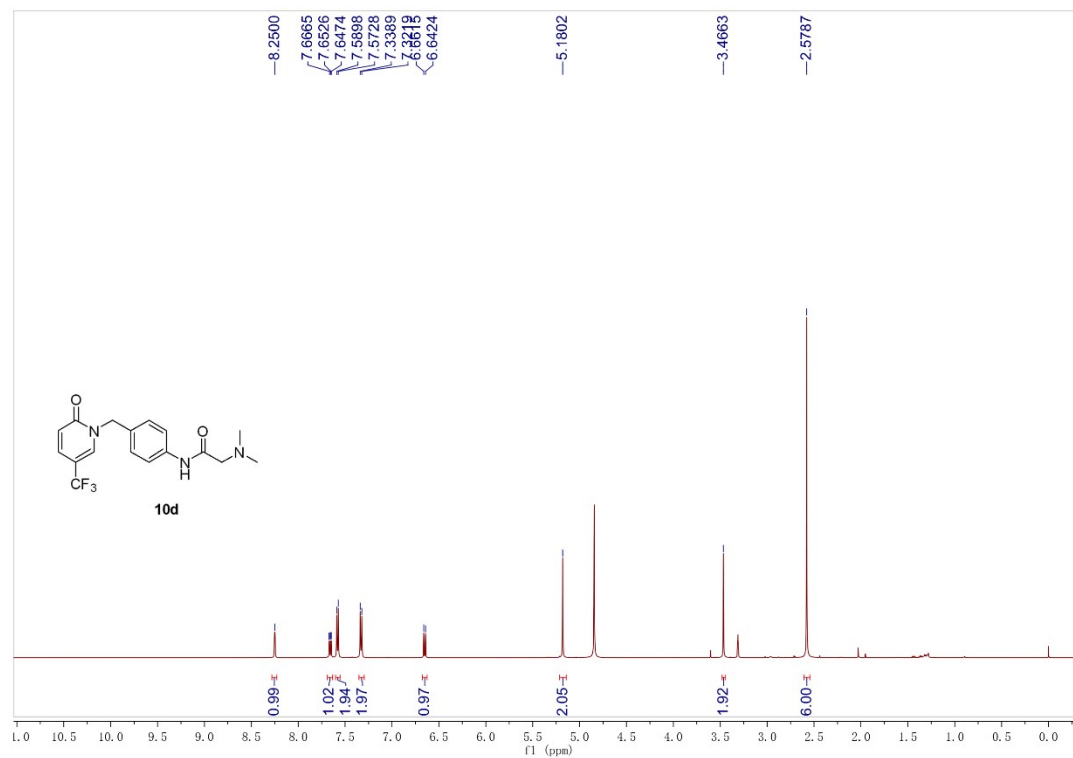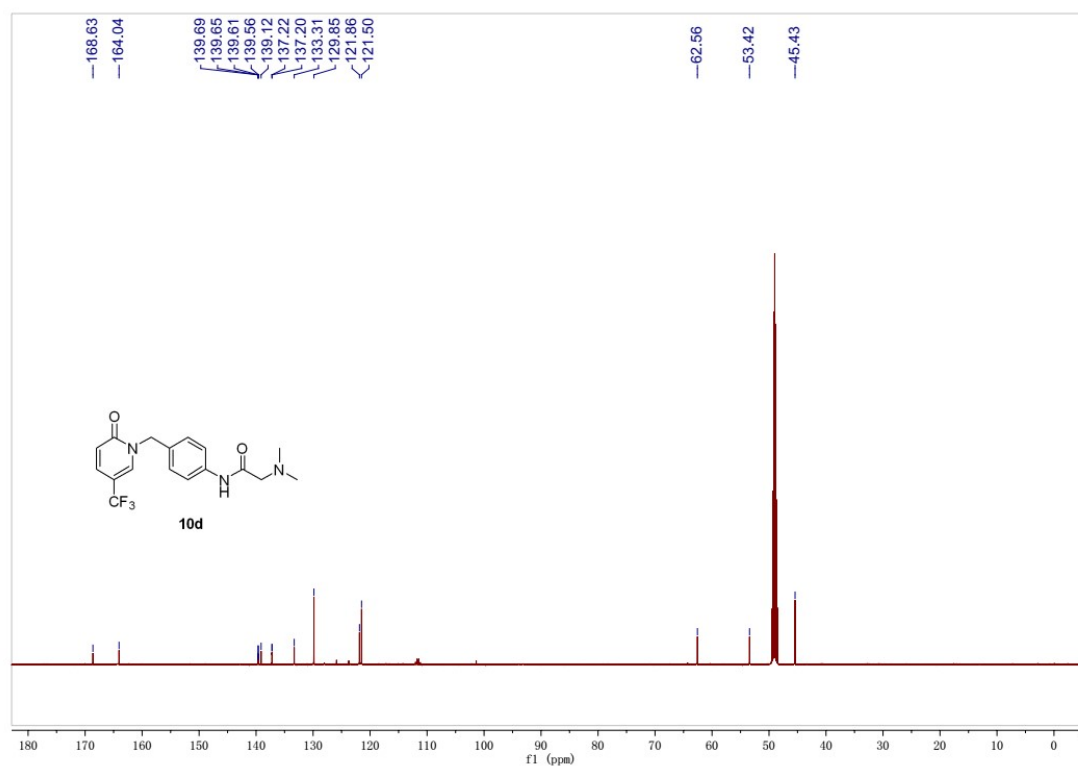

Mass of **10d**

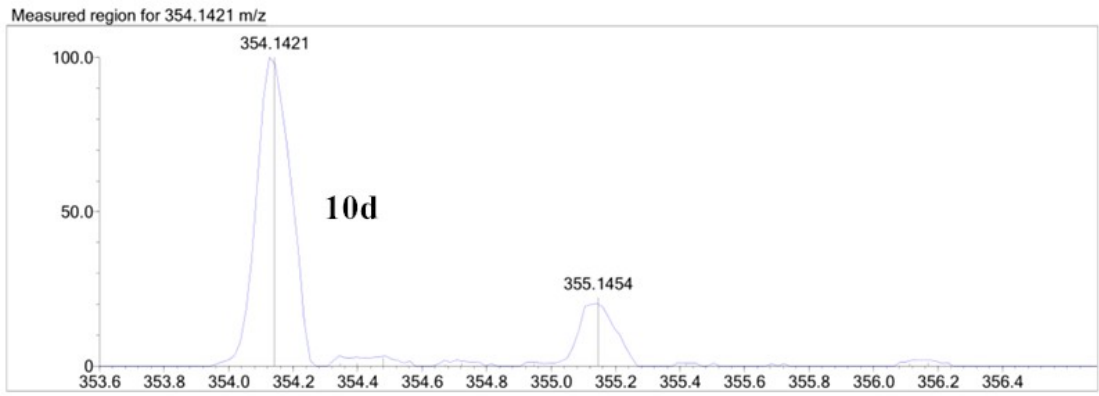

### HPLC of 10d

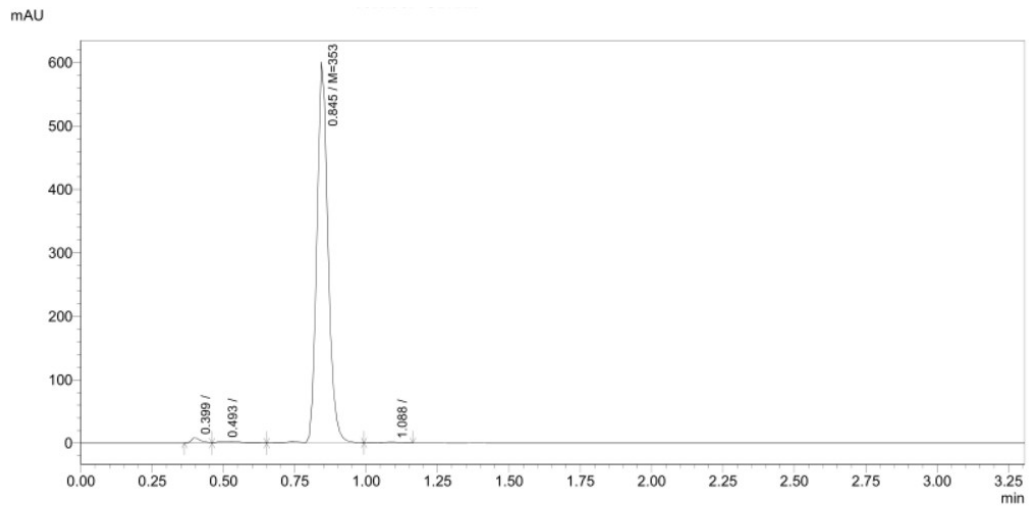

峰表

| 保留时间  | 化合物名  | 峰宽(高度 50%) | 高度     | 面积      | 面积%     | 理论塔板数(USP) | 拖尾因子  | 分离度(USP) |
|-------|-------|------------|--------|---------|---------|------------|-------|----------|
| 0.399 |       | 0.035      | 8136   | 20167   | 1.198   | 459        | --    | --       |
| 0.493 |       | 0.086      | 3170   | 19510   | 1.159   | 190        | --    | 0.864    |
| 0.845 | M=353 | 0.041      | 600939 | 1635676 | 97.170  | 1626       | 1.160 | 3.098    |
| 1.088 |       | 0.056      | 1486   | 7956    | 0.473   | 1224       | --    | 2.333    |
|       |       |            | 613732 | 1683308 | 100.000 |            |       |          |

# $^1\text{H}$ NMR and $^{13}\text{C}$ NMR of *11a*

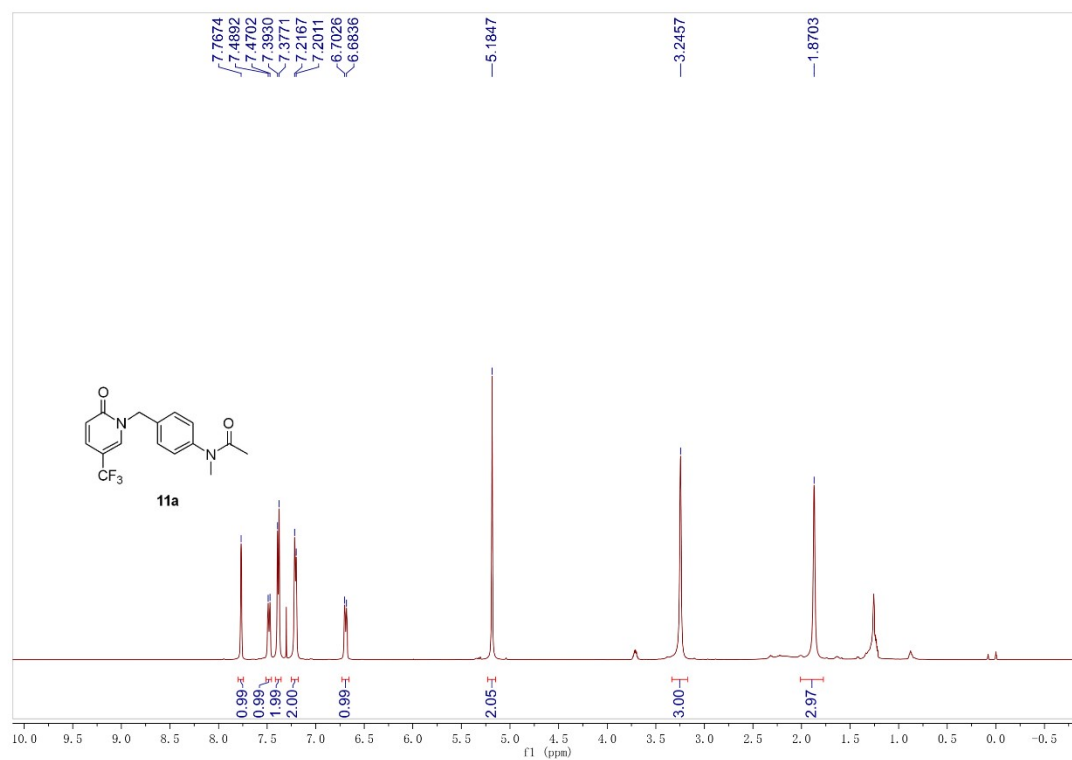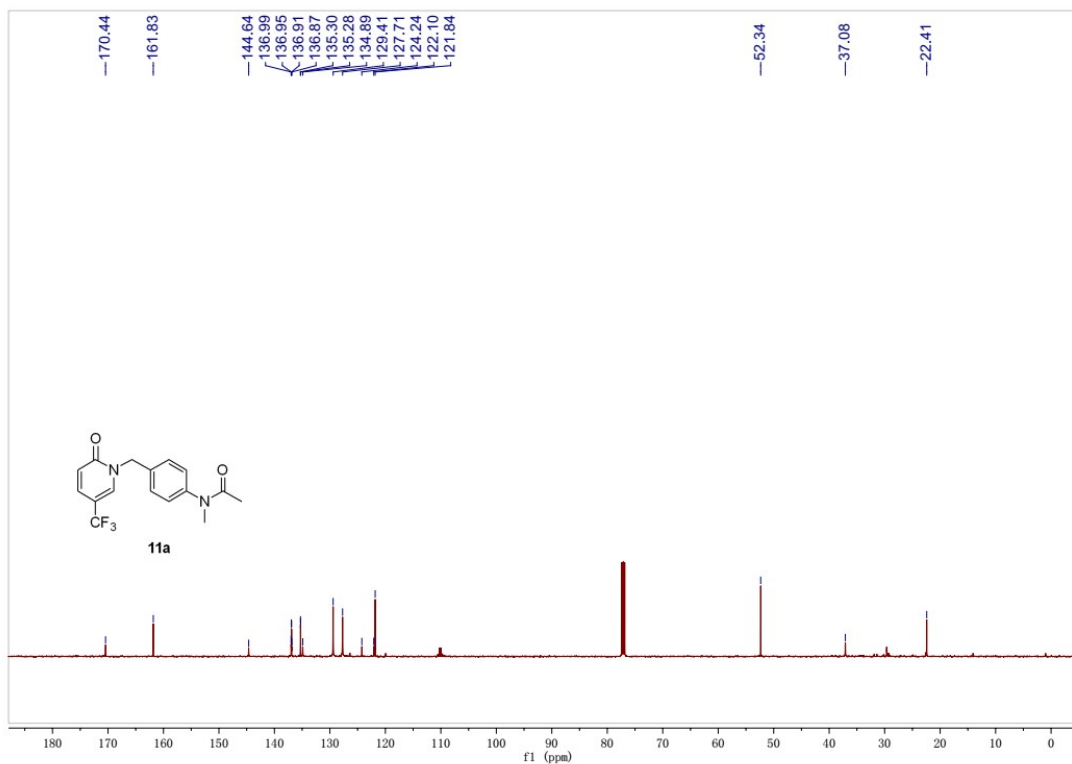

## Mass of *11a*

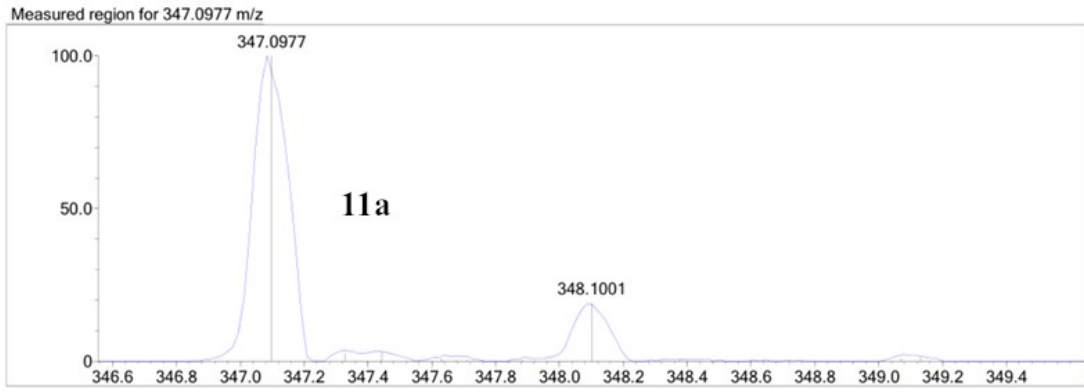

### HPLC of 11a

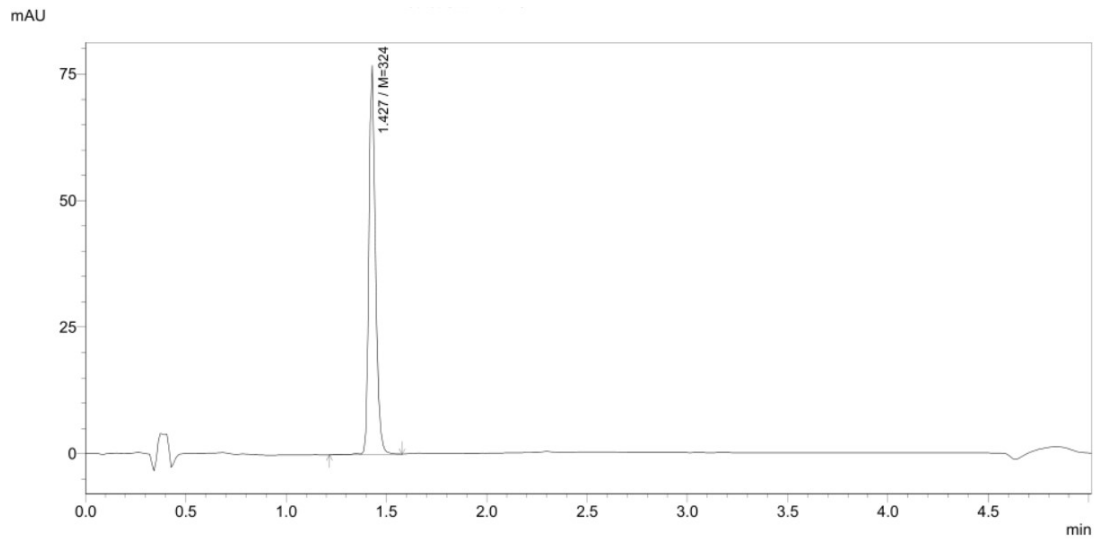

峰表

| 保留时间  | 化合物名  | 峰宽(高度 50%) | 高度    | 面积     | 面积%     | 理论塔板数(USP) | 拖尾因子  | 分离度(USP) |
|-------|-------|------------|-------|--------|---------|------------|-------|----------|
| 1.427 | M=324 | 0.034      | 76927 | 172646 | 100.000 | 7567       | 1.248 | —        |
|       |       |            | 76927 | 172646 | 100.000 |            |       |          |



# $^1\text{H}$ NMR and $^{13}\text{C}$ NMR of **11b**

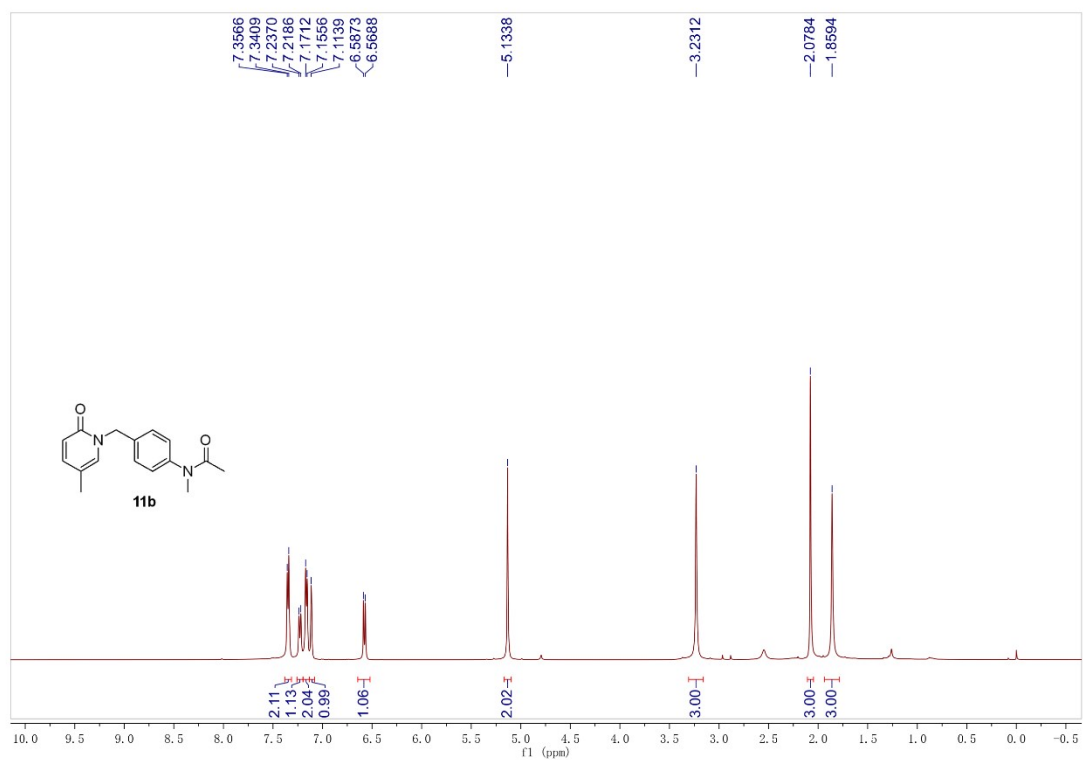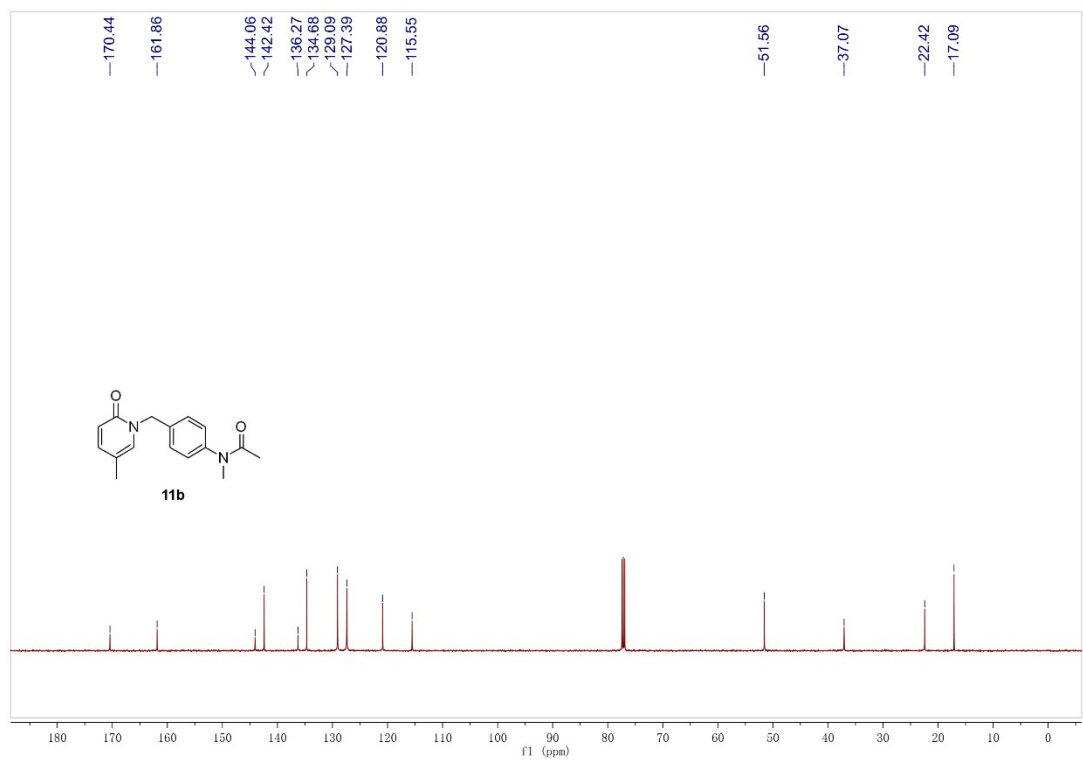

Mass of **11b**

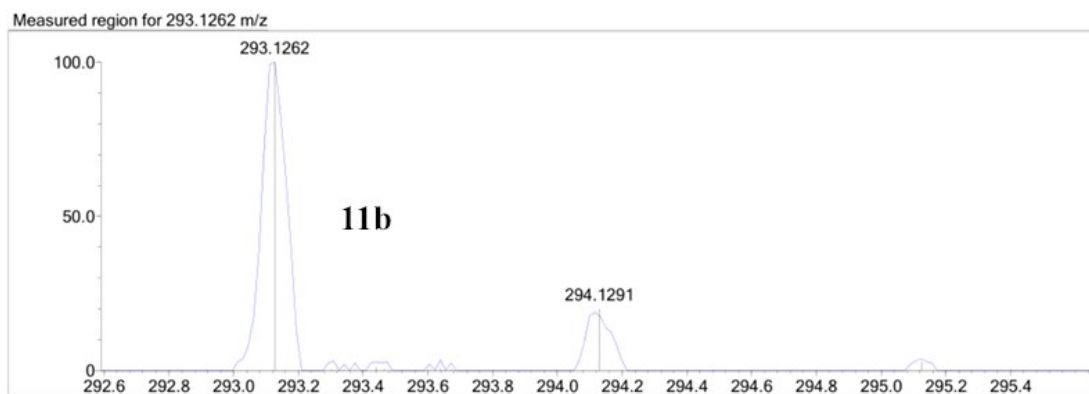

### HPLC of **11b**

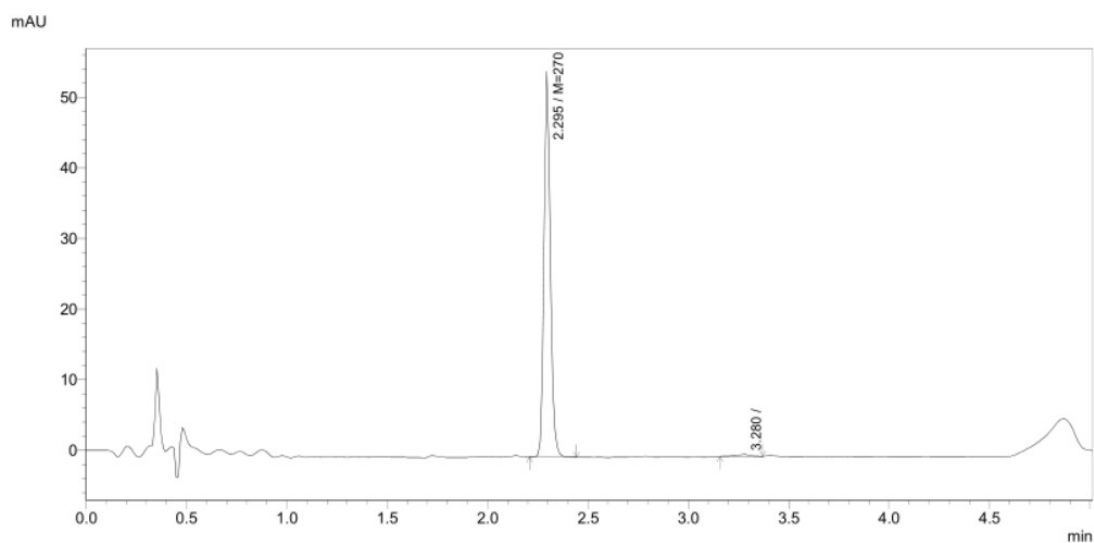

峰表

| 保留时间  | 化合物名  | 峰宽(高度 50%) | 高度    | 面积     | 面积%    | 理论塔板数(USP) | 拖尾因子  | 分离度(USP) |
|-------|-------|------------|-------|--------|--------|------------|-------|----------|
| 2.295 | M=270 | 0.033      | 54667 | 119486 | 99.004 | 18556      | 1.202 | ---      |
| 3.280 |       | 0.058      | 277   | 1203   | 0.996  | 11936      | 0.733 | 10.514   |

### Impurity analysis of **5d** and **9d**.

#### The synthetic route **5d**.

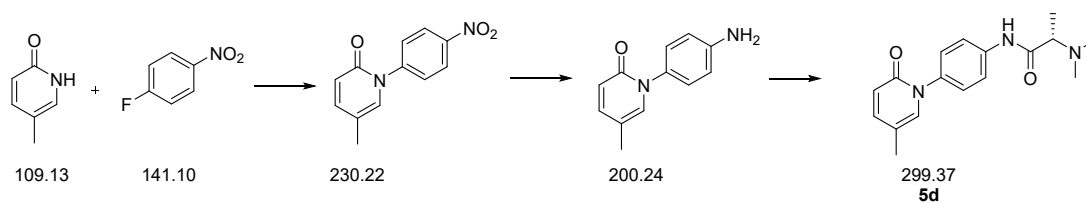

The LC-MS analysis of the mixed samples of the optimal compound **5d** and the substrates and intermediates

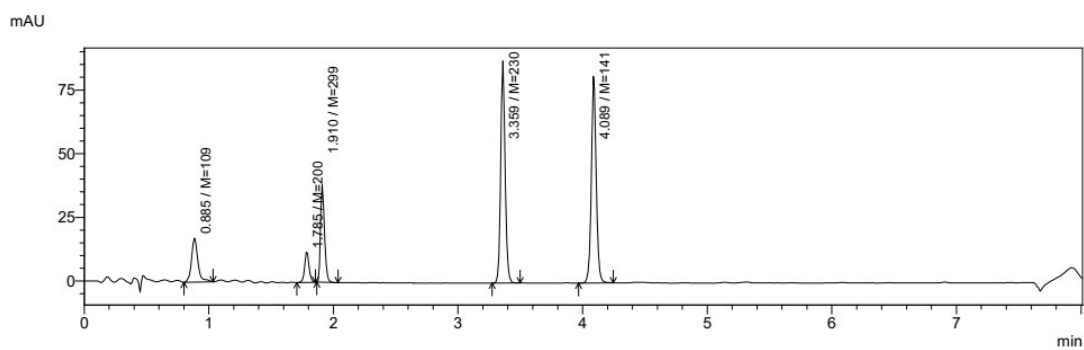

峰表

| Ret. time | Name  | width | height | Area   | Area%  | Theoretical Plate(USP) | Tailing Factor | Resolutin(UPS) |
|-----------|-------|-------|--------|--------|--------|------------------------|----------------|----------------|
| 0.885     | M=109 | 0.051 | 17385  | 61423  | 9.985  | 1149                   | 1.344          | --             |
| 1.785     | M=200 | 0.039 | 11954  | 30727  | 4.995  | 8670                   | 1.069          | 9.938          |
| 1.910     | M=299 | 0.034 | 38333  | 83425  | 13.562 | 12313                  | 1.283          | 1.710          |
| 3.359     | M=230 | 0.037 | 87234  | 212533 | 34.550 | 32662                  | 1.103          | 20.242         |
| 4.089     | M=141 | 0.042 | 81113  | 227046 | 36.909 | 38026                  | 1.057          | 9.219          |

The LC-MS analysis of the optimal compound **5d**.

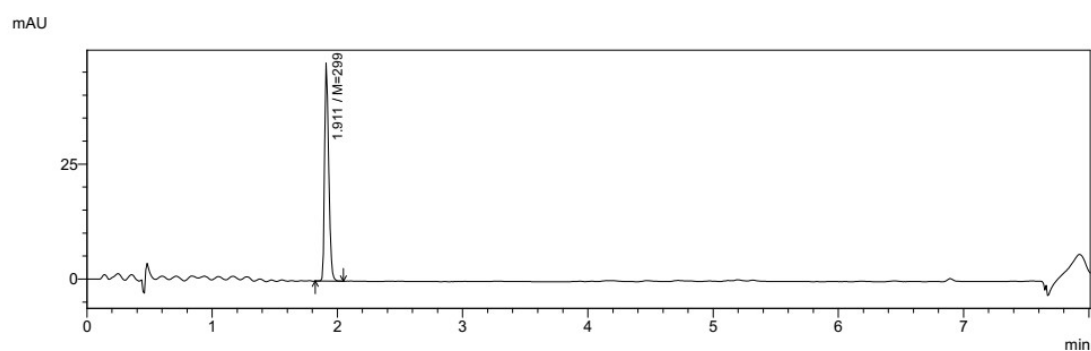

峰表

| Ret. time | Name  | width | height | Area   | Area%   | Theoretical Plate(USP) | Tailing Factor | Resolutin(UPS) |
|-----------|-------|-------|--------|--------|---------|------------------------|----------------|----------------|
| 1.911     | M=299 | 0.035 | 47372  | 107621 | 100.000 | 11852                  | 1.303          | --             |
|           |       |       | 47372  | 107621 | 100.000 |                        |                |                |

The synthetic route **9d**.

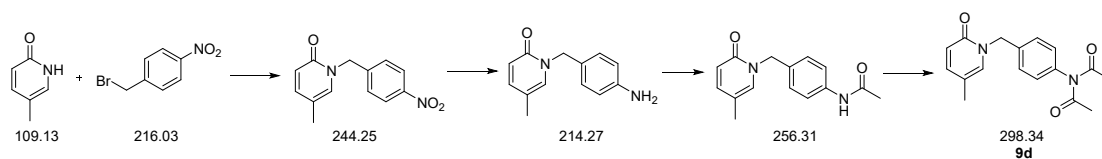

The LC-MS analysis of the mixed samples of the optimal compound **9d** and the substrates and intermediates

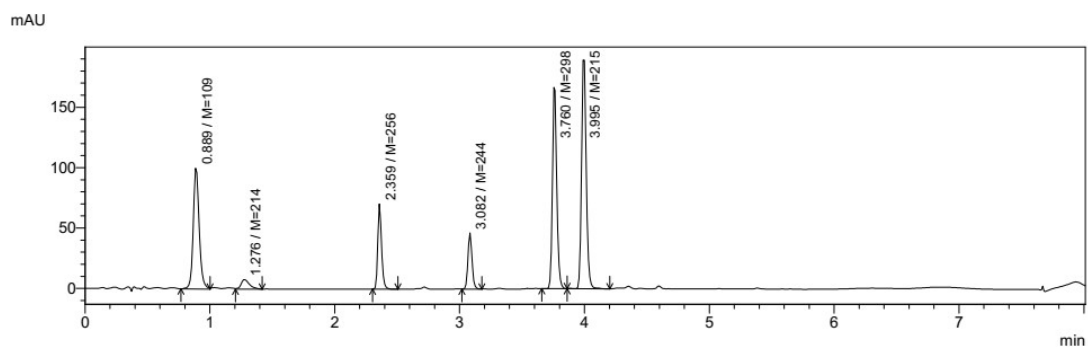

峰表

| Ret. time | Name  | width | height | Area   | Area%  | Theoretical Plate(USP) | Tailing Factor | Resolutin(UPS) |
|-----------|-------|-------|--------|--------|--------|------------------------|----------------|----------------|
| 0.889     | M=109 | 0.048 | 100003 | 329761 | 21.612 | 1313                   | 1.138          | --             |
| 1.276     | M=214 | 0.070 | 7967   | 38144  | 2.500  | 1333                   | --             | 3.253          |
| 2.359     | M=256 | 0.032 | 70666  | 146847 | 9.624  | 21474                  | 1.213          | 10.603         |
| 3.082     | M=244 | 0.035 | 46440  | 105863 | 6.938  | 31251                  | 1.138          | 10.784         |
| 3.760     | M=298 | 0.038 | 166673 | 414733 | 27.181 | 41318                  | 1.164          | 9.432          |

The LC-MS analysis of the optimal compound **9d**.

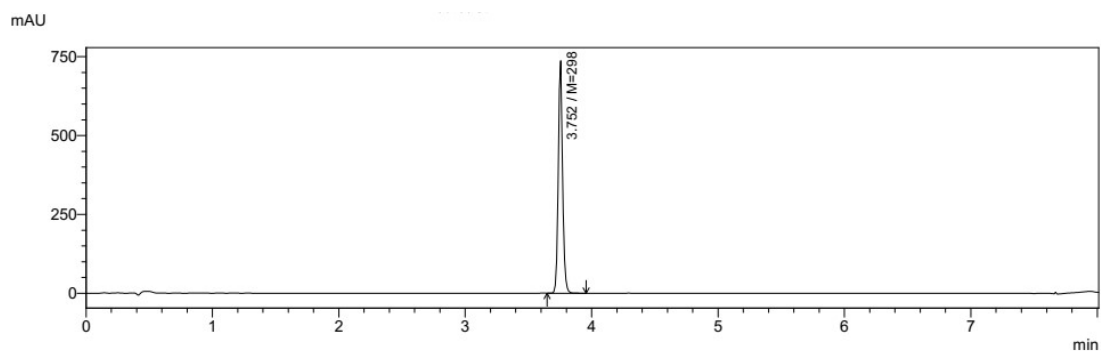

峰表

| Ret. time | Name  | width | height | Area    | Area%   | Theoretical Plate(USP) | Tailing Factor | Resolutin(UPS) |
|-----------|-------|-------|--------|---------|---------|------------------------|----------------|----------------|
| 3.752     | M=298 | 0.037 | 736871 | 1793217 | 100.000 | 42471                  | 1.104          | --             |
|           |       |       | 736871 | 1793217 | 100.000 |                        |                |                |
